# Supplementary material
Source: ML conference proceedings conference paper supplement (https://aclanthology.org/2024.emnlp-main.280)

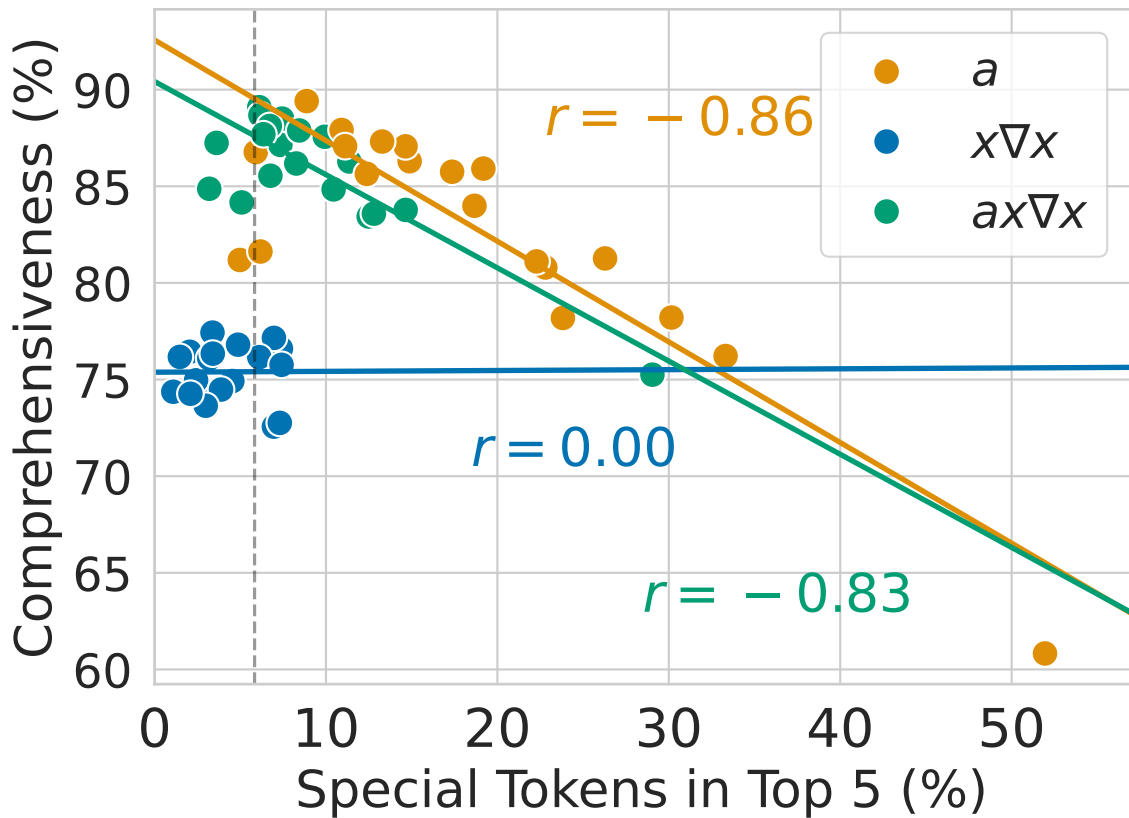

Supplement: software [file 2024.emnlp-main.280.software.zip]

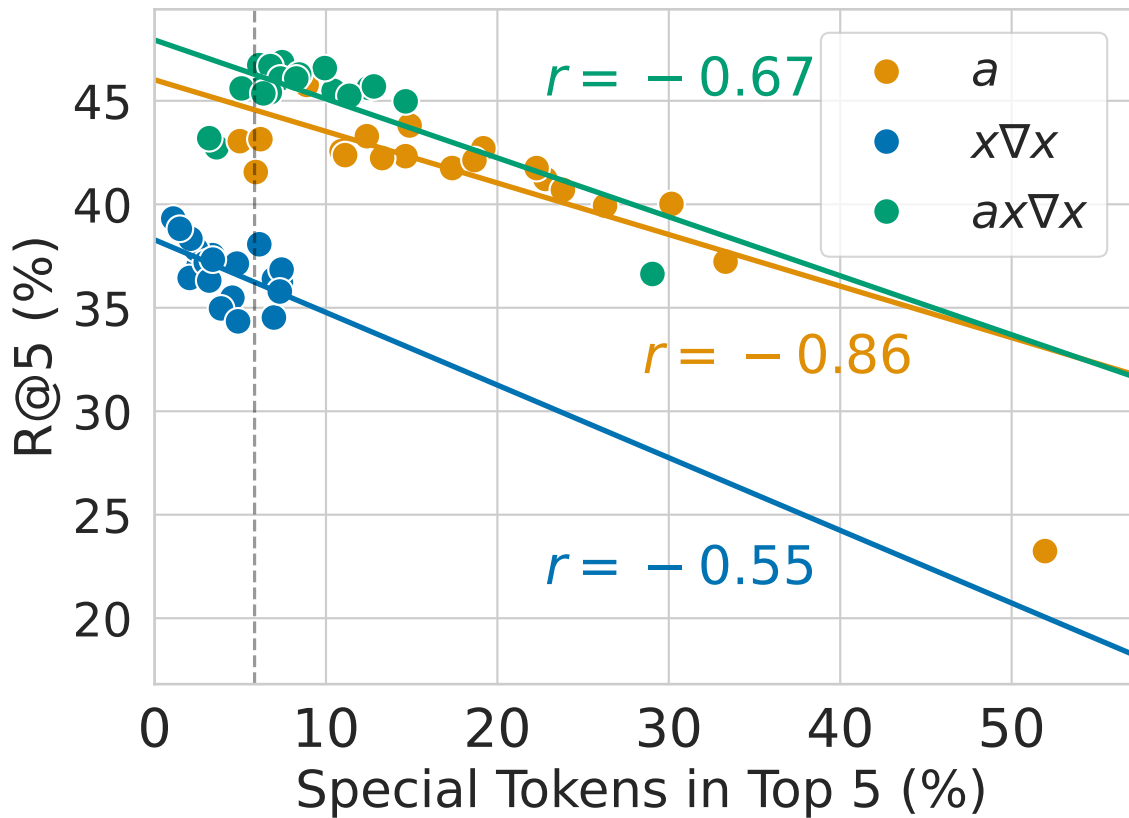

Supplement: software [file 2024.emnlp-main.280.software.zip]

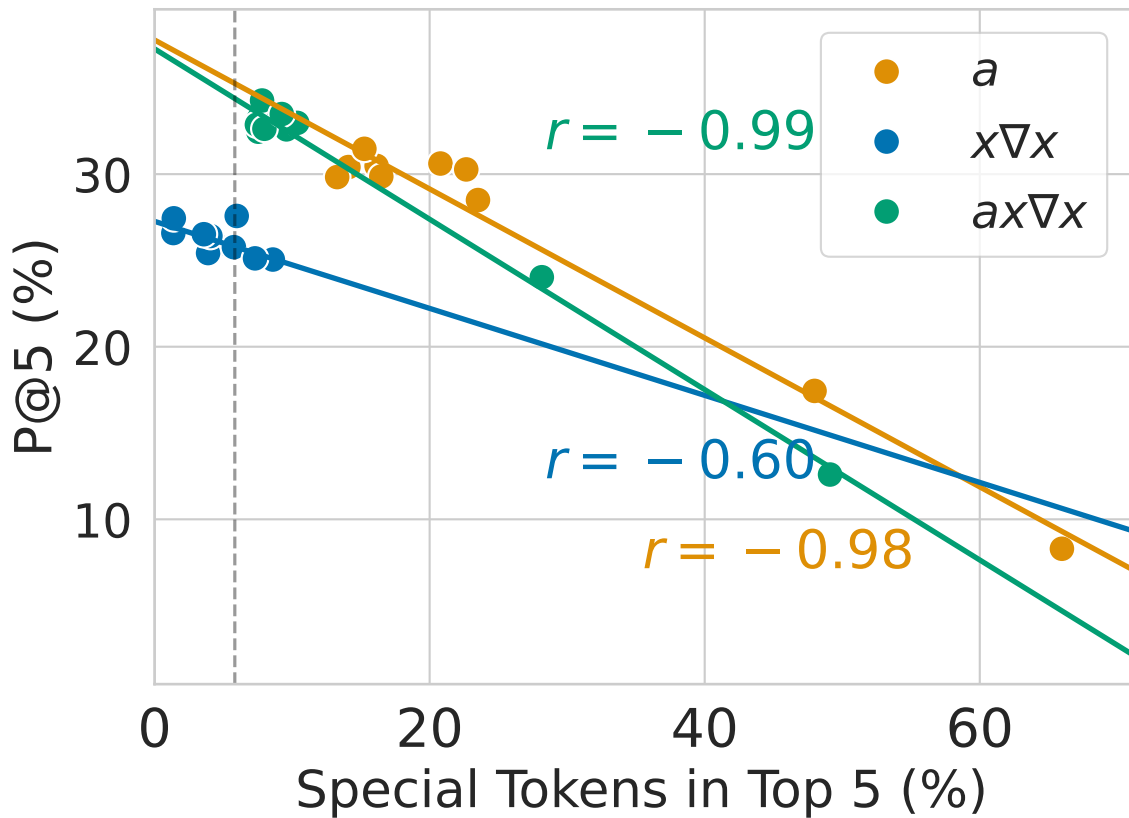

Supplement: software [file 2024.emnlp-main.280.software.zip]

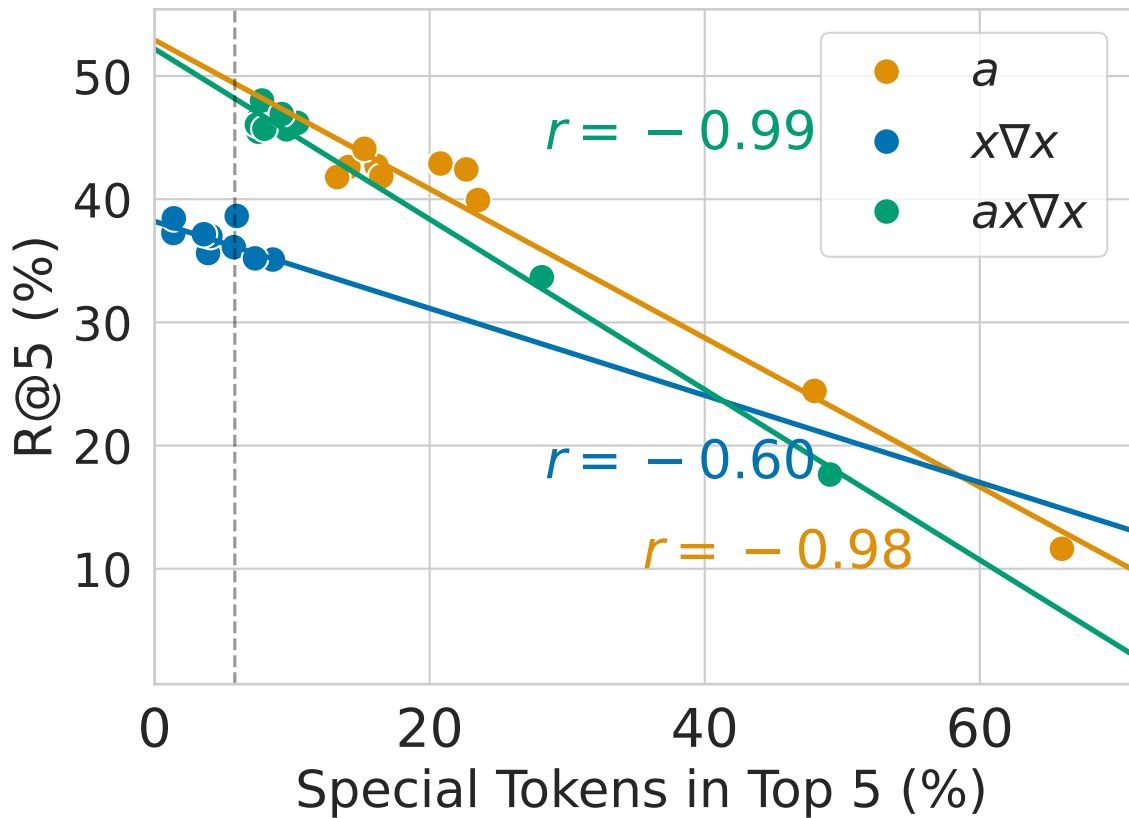

Supplement: software [file 2024.emnlp-main.280.software.zip]

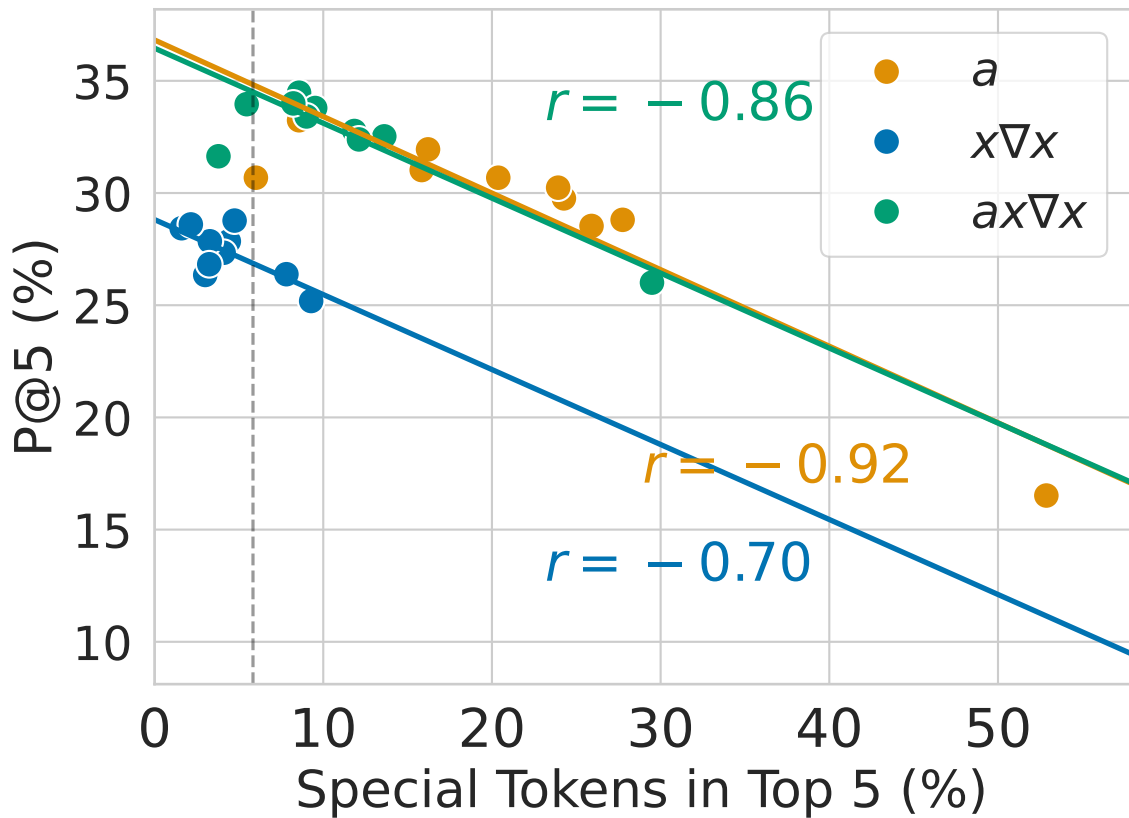

Supplement: software [file 2024.emnlp-main.280.software.zip]

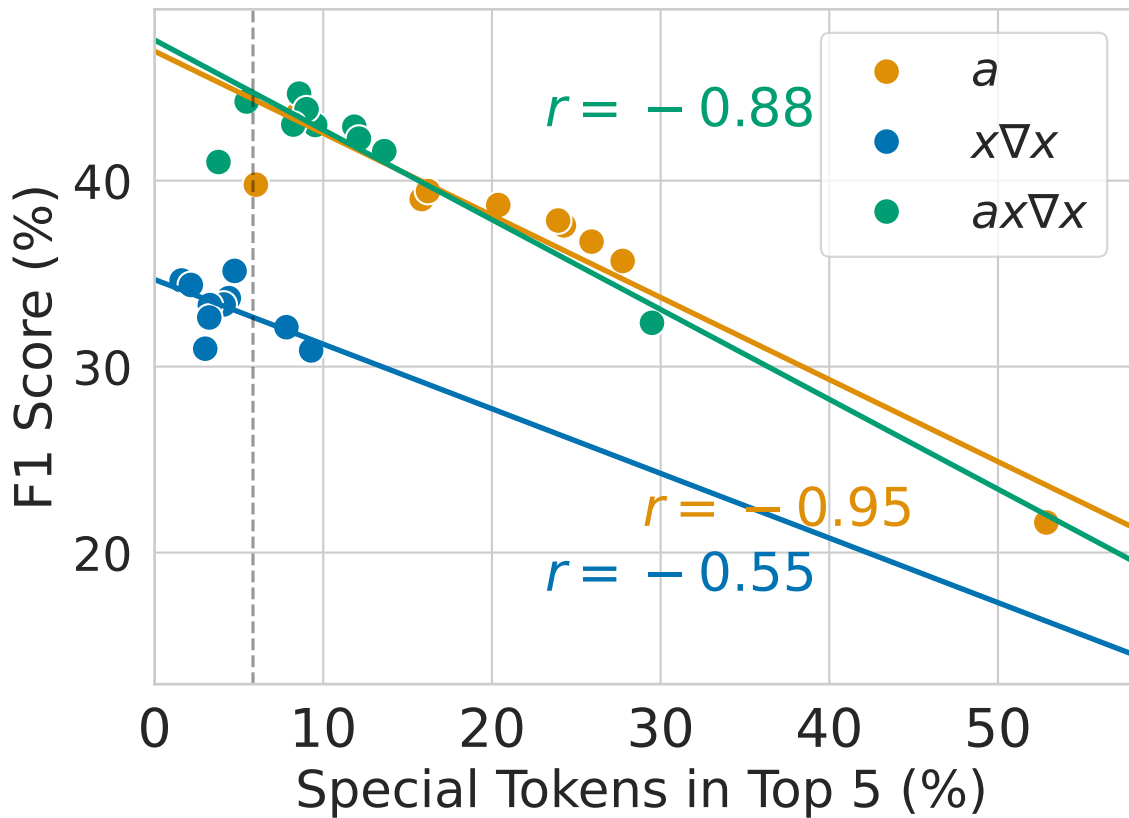

Supplement: software [file 2024.emnlp-main.280.software.zip]

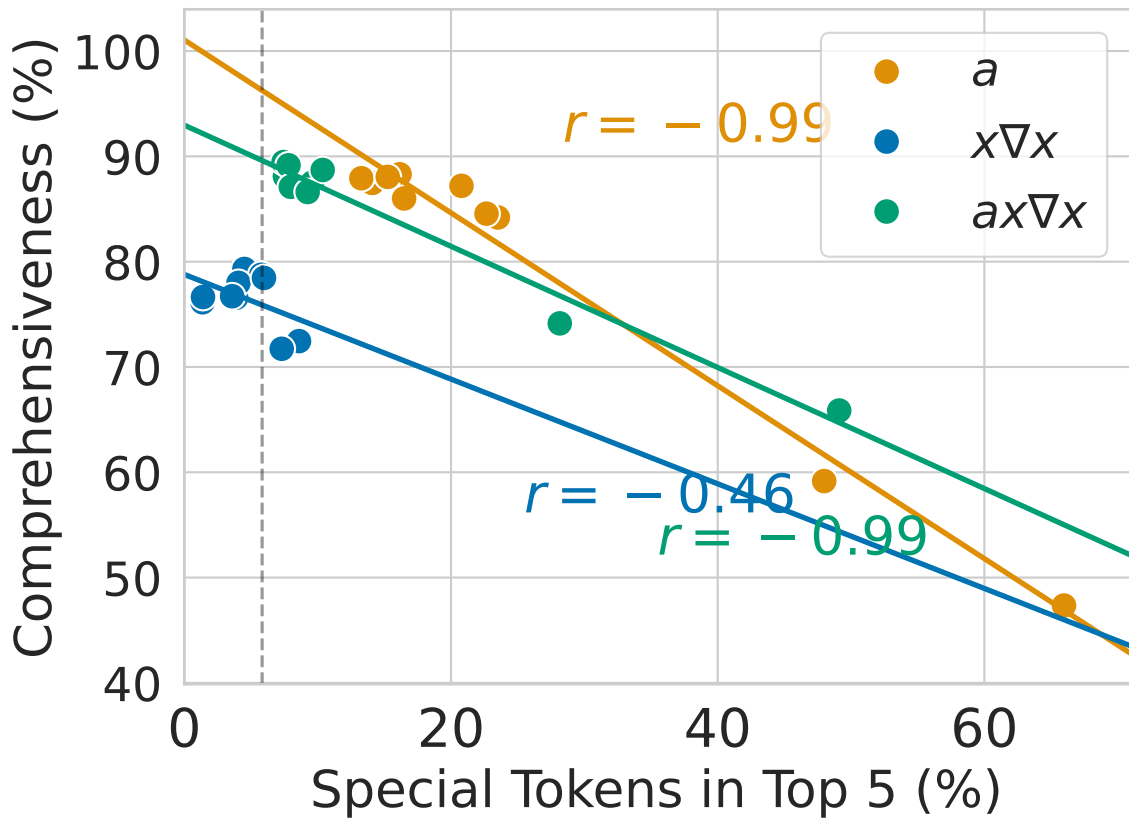

Supplement: software [file 2024.emnlp-main.280.software.zip]

a Under the Precision-Recall Curve (

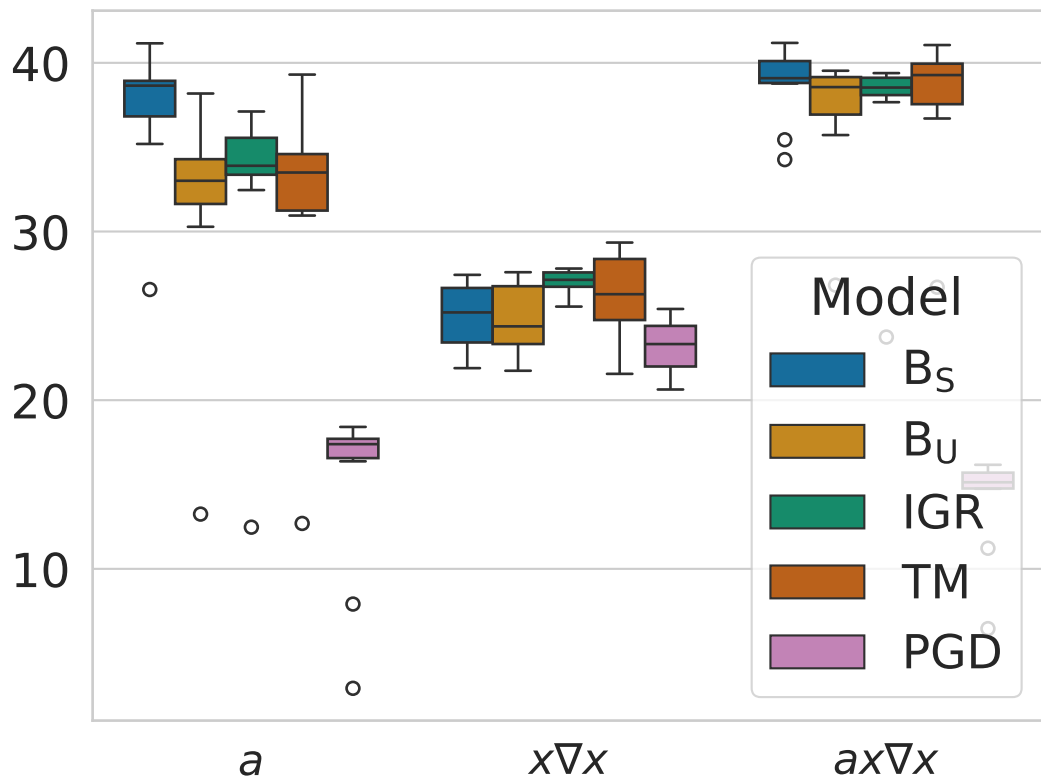

Supplement: software [file 2024.emnlp-main.280.software.zip]

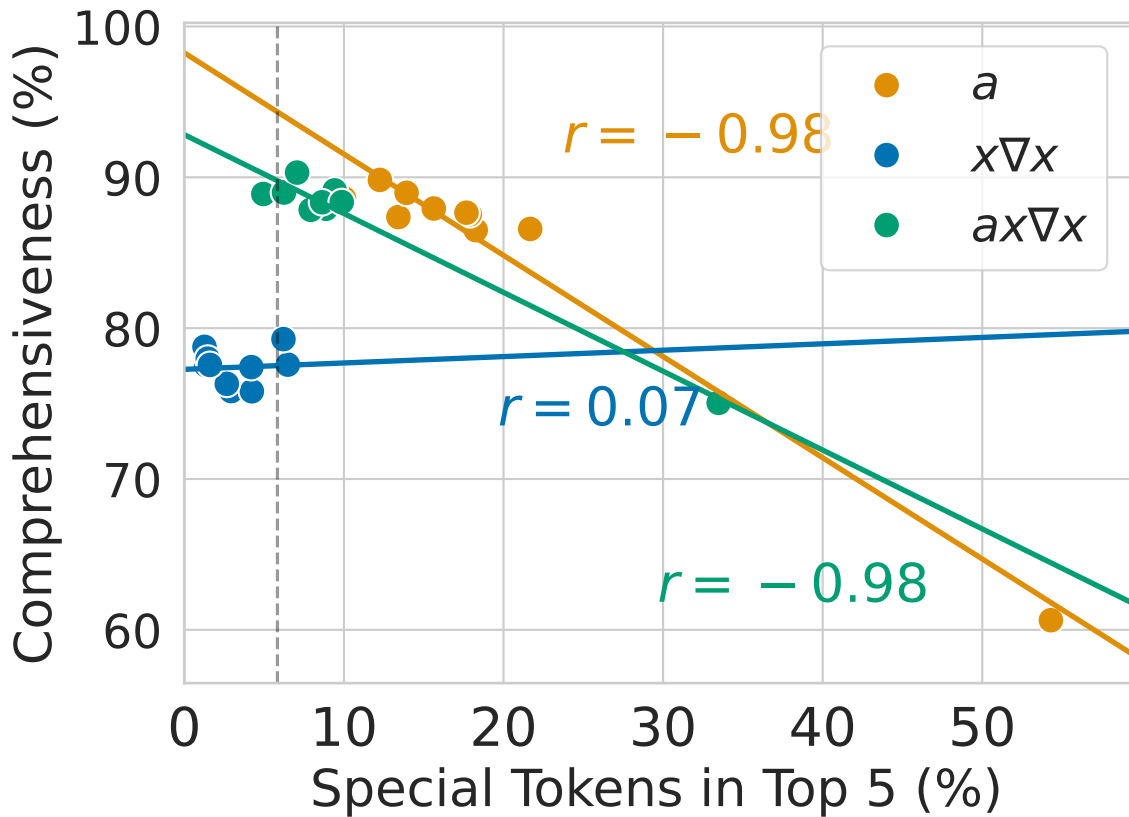

Supplement: software [file 2024.emnlp-main.280.software.zip]

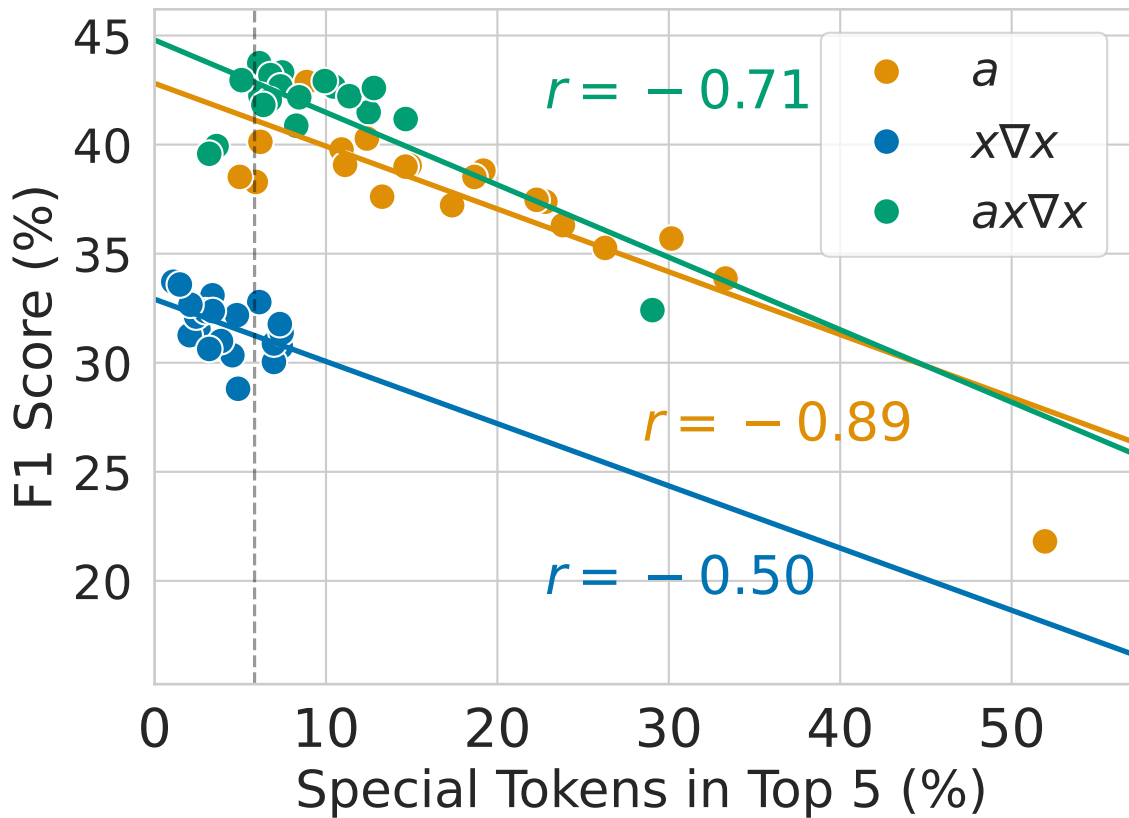

Supplement: software [file 2024.emnlp-main.280.software.zip]

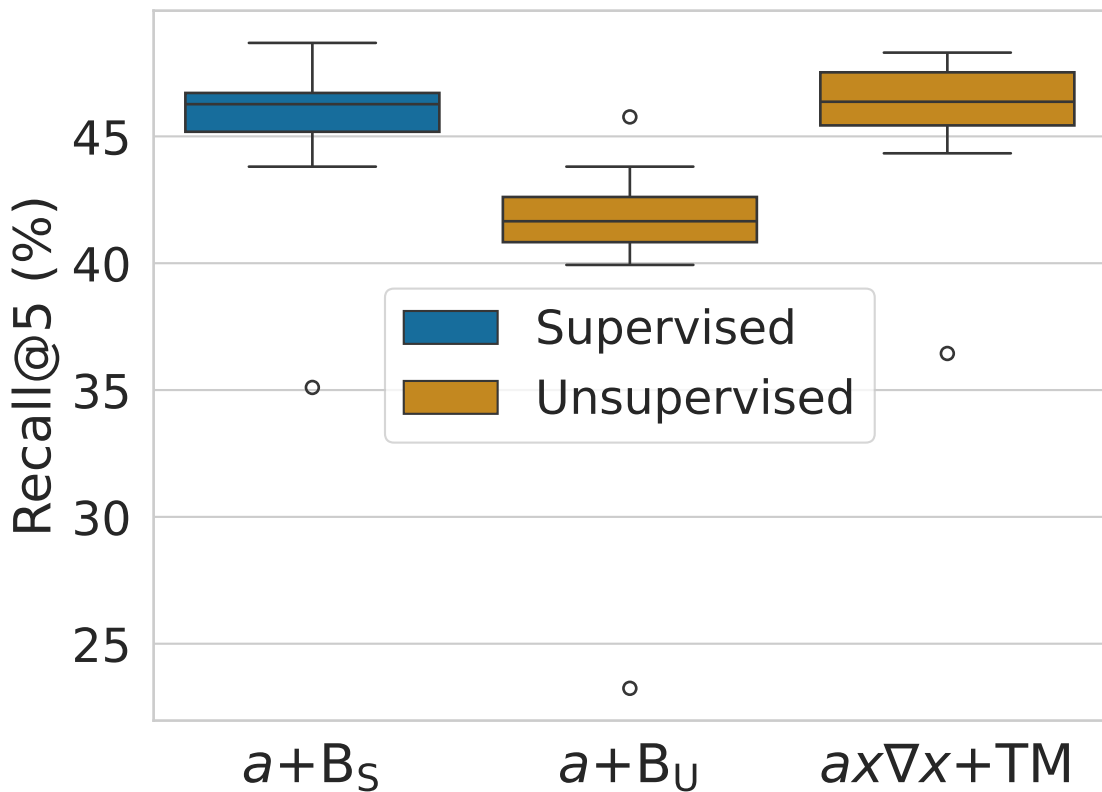

Supplement: software [file 2024.emnlp-main.280.software.zip]

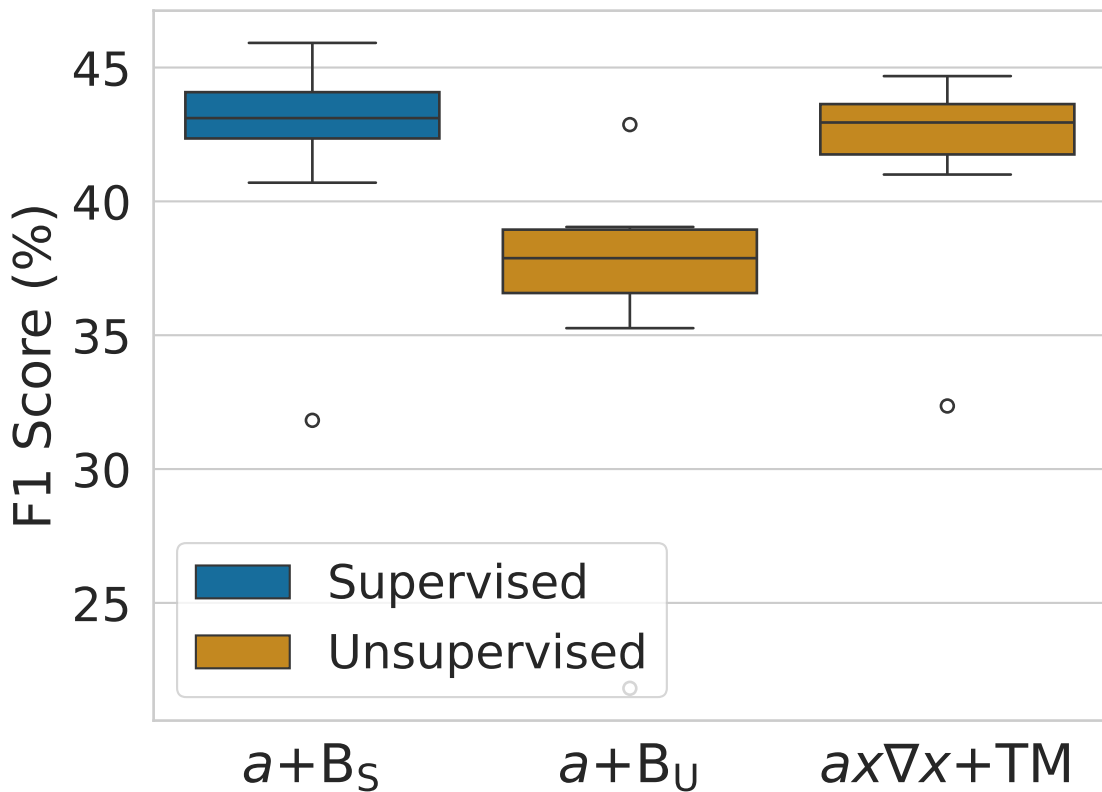

Supplement: software [file 2024.emnlp-main.280.software.zip]

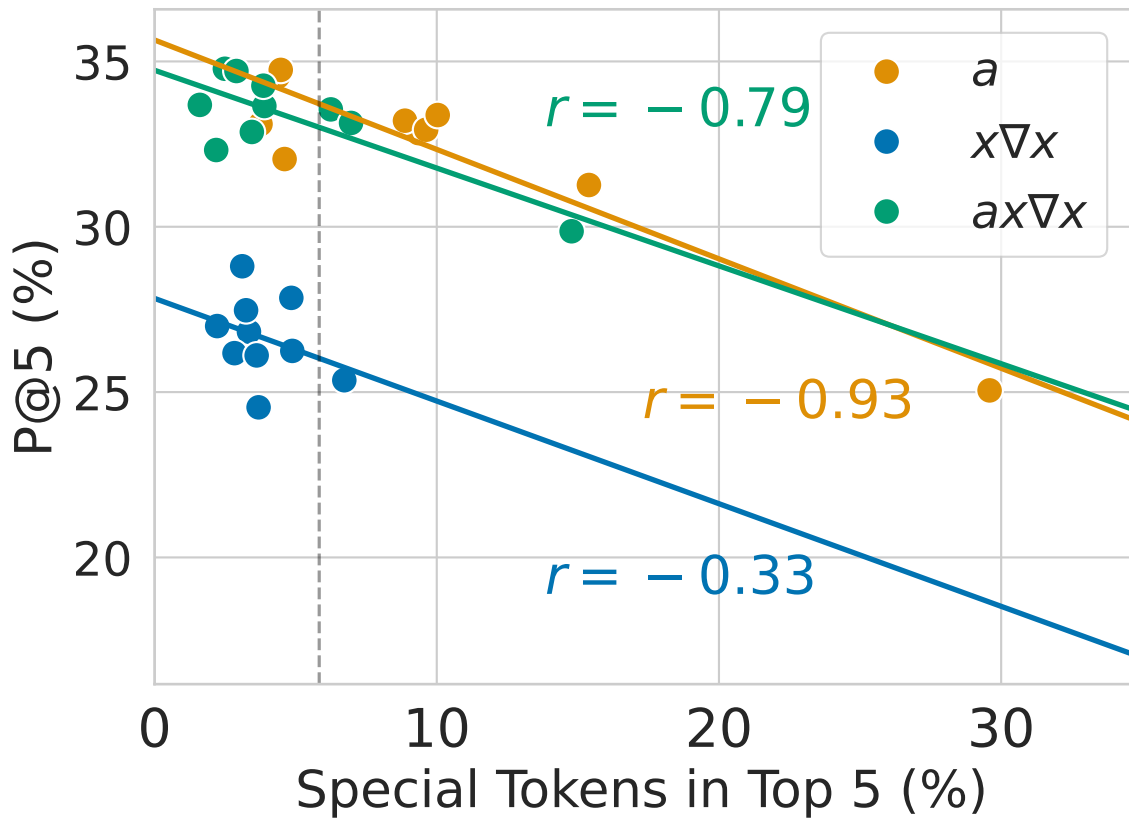

Supplement: software [file 2024.emnlp-main.280.software.zip]

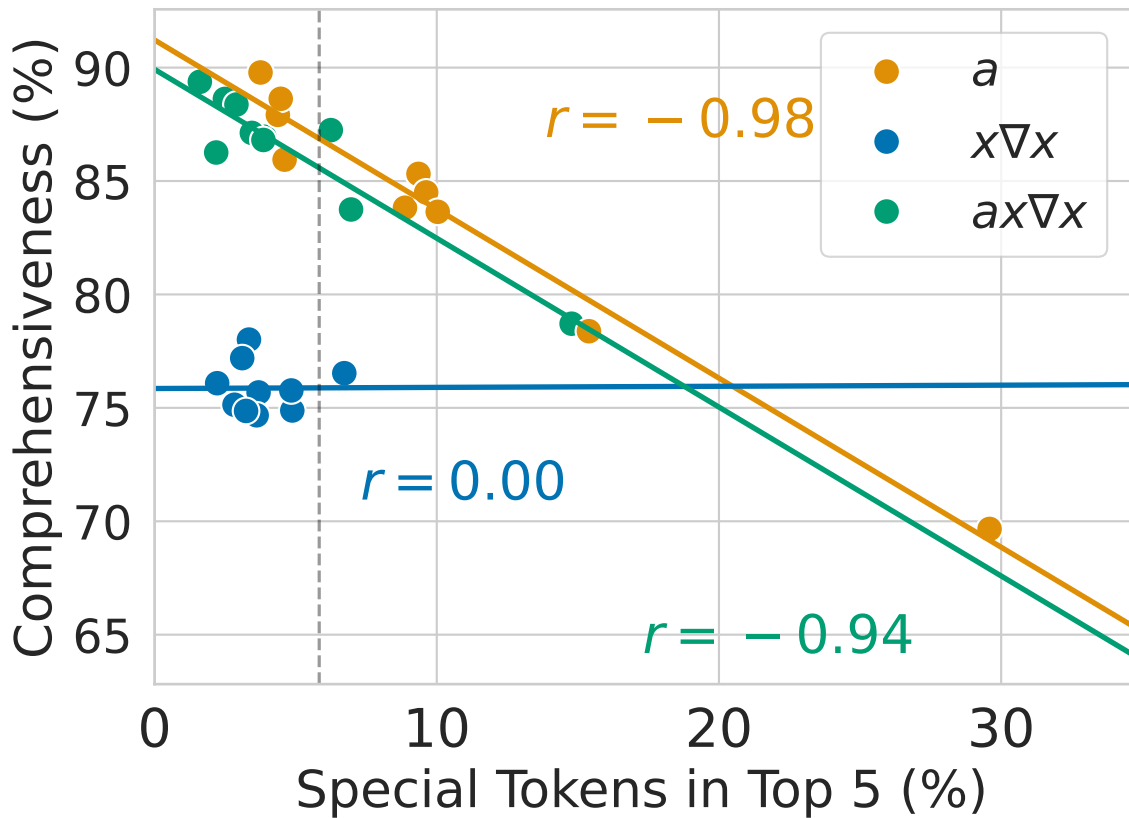

Supplement: software [file 2024.emnlp-main.280.software.zip]

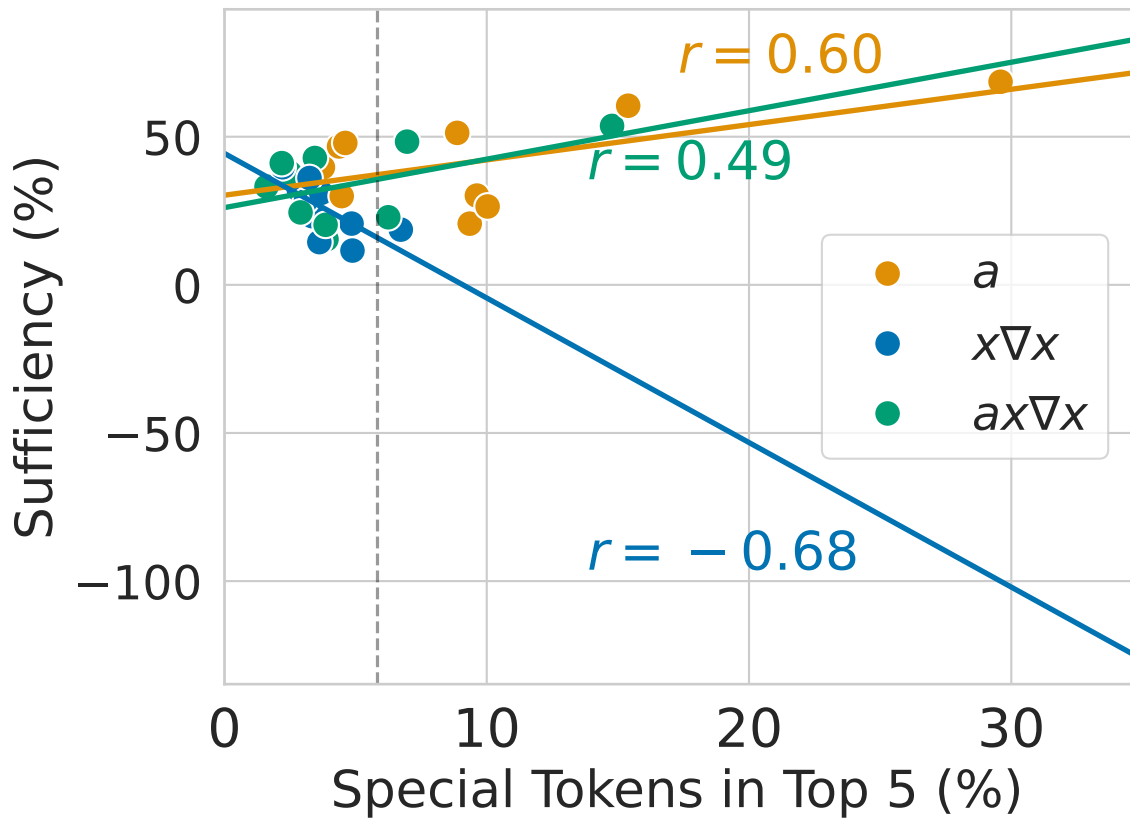

Supplement: software [file 2024.emnlp-main.280.software.zip]

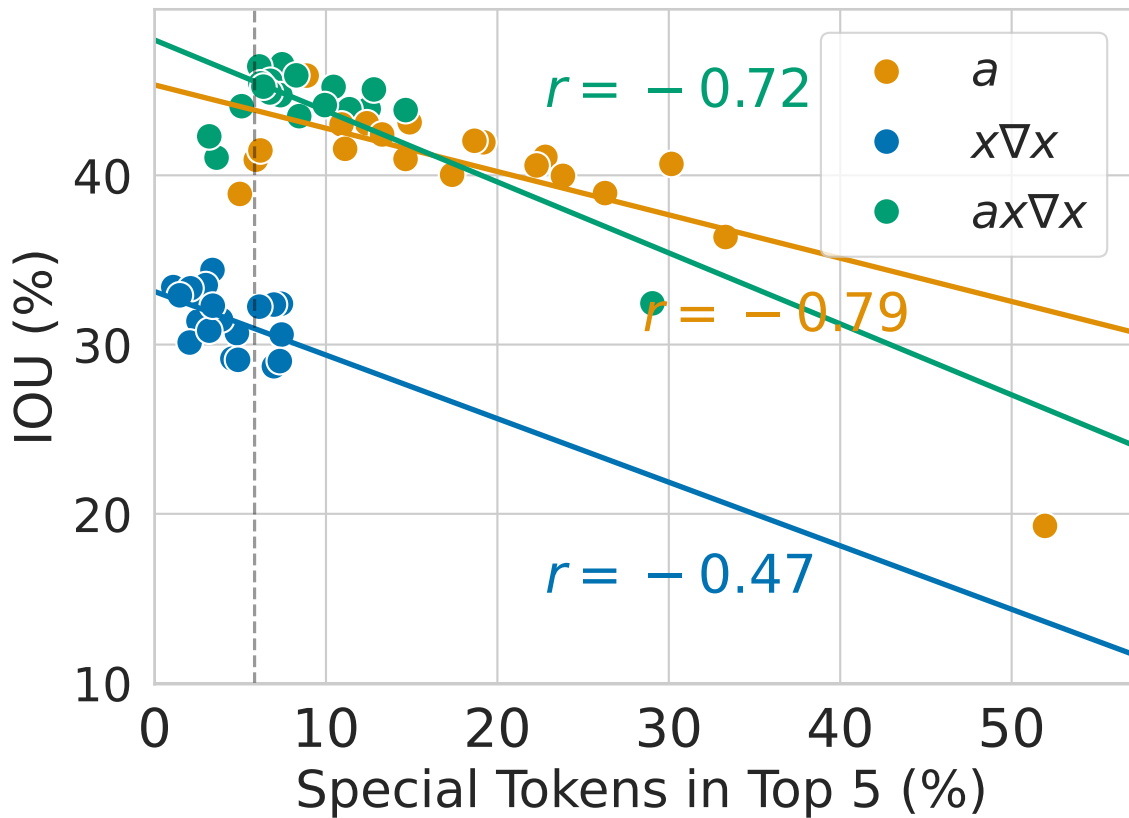

Supplement: software [file 2024.emnlp-main.280.software.zip]

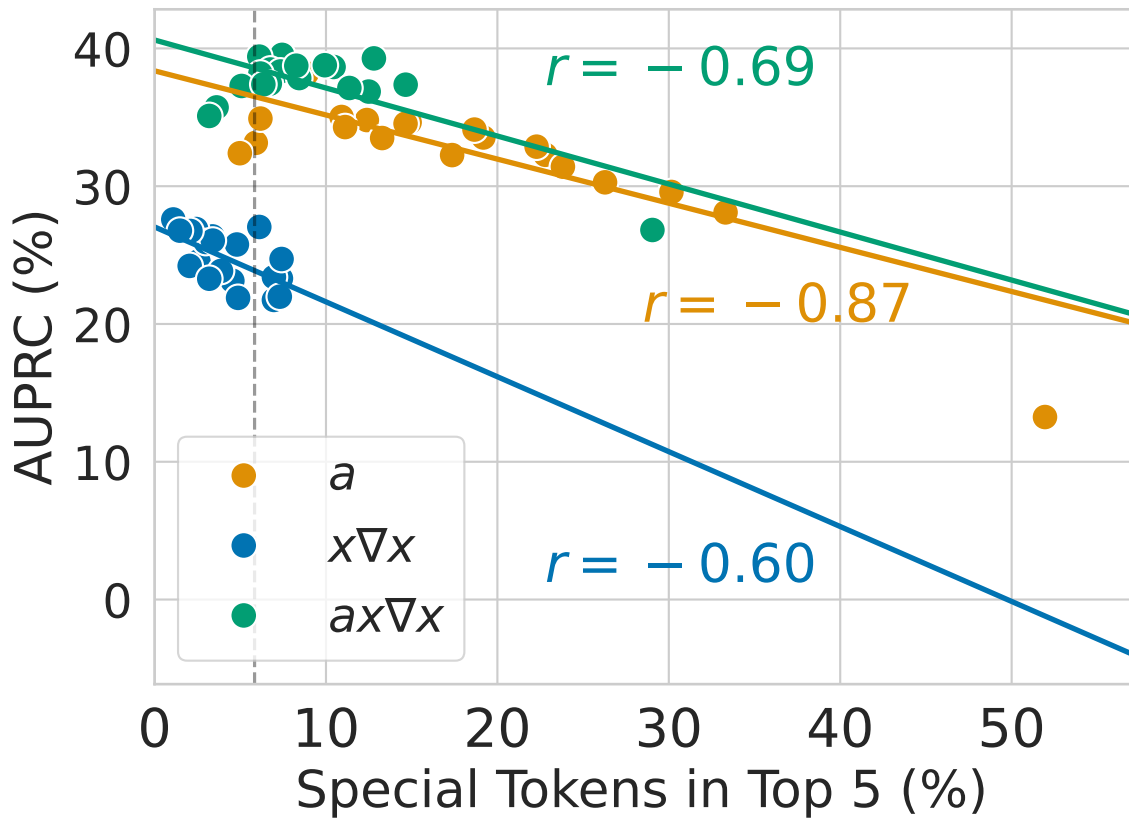

Supplement: software [file 2024.emnlp-main.280.software.zip]

Comprehensiveness

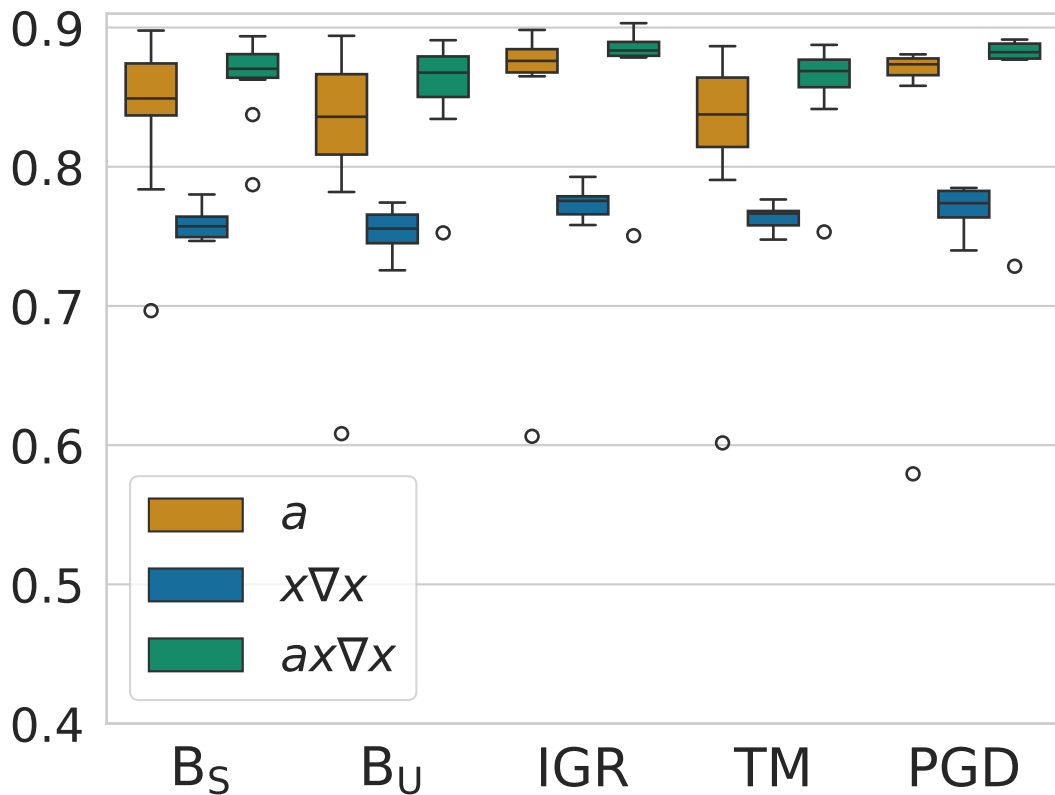

Supplement: software [file 2024.emnlp-main.280.software.zip]

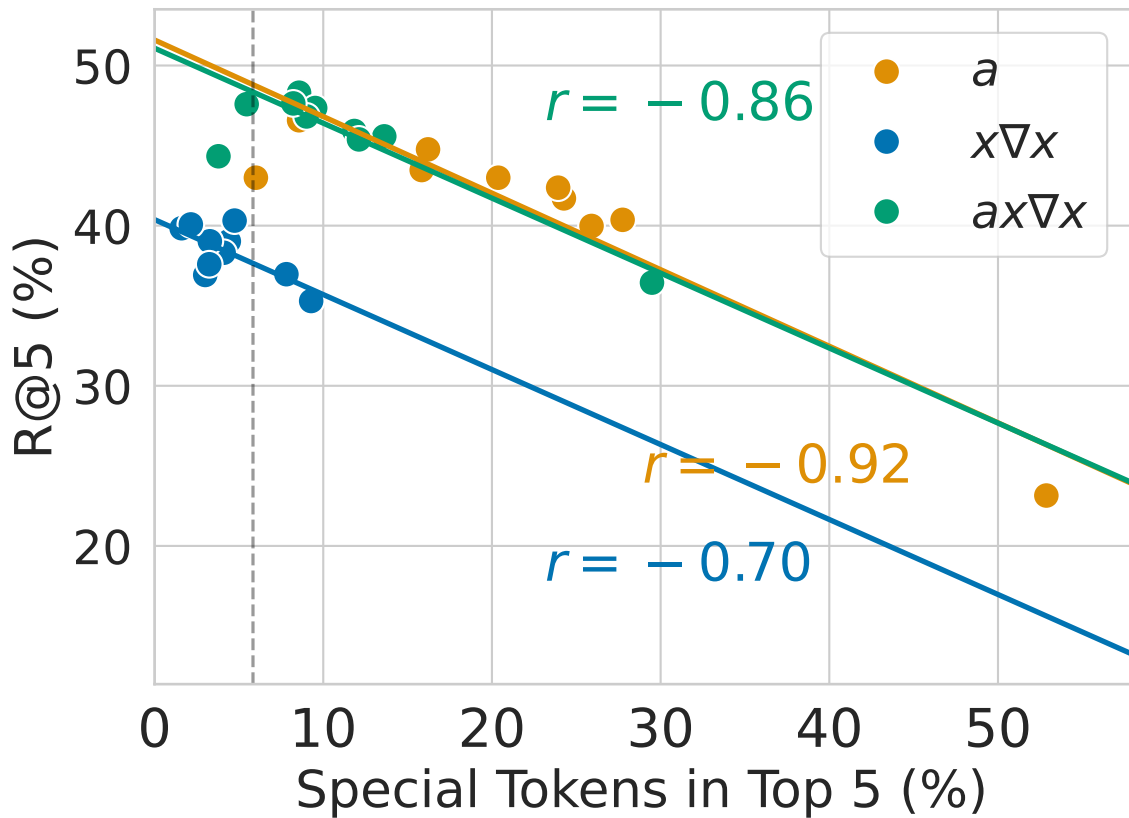

Supplement: software [file 2024.emnlp-main.280.software.zip]

Intersection over Unions (%)

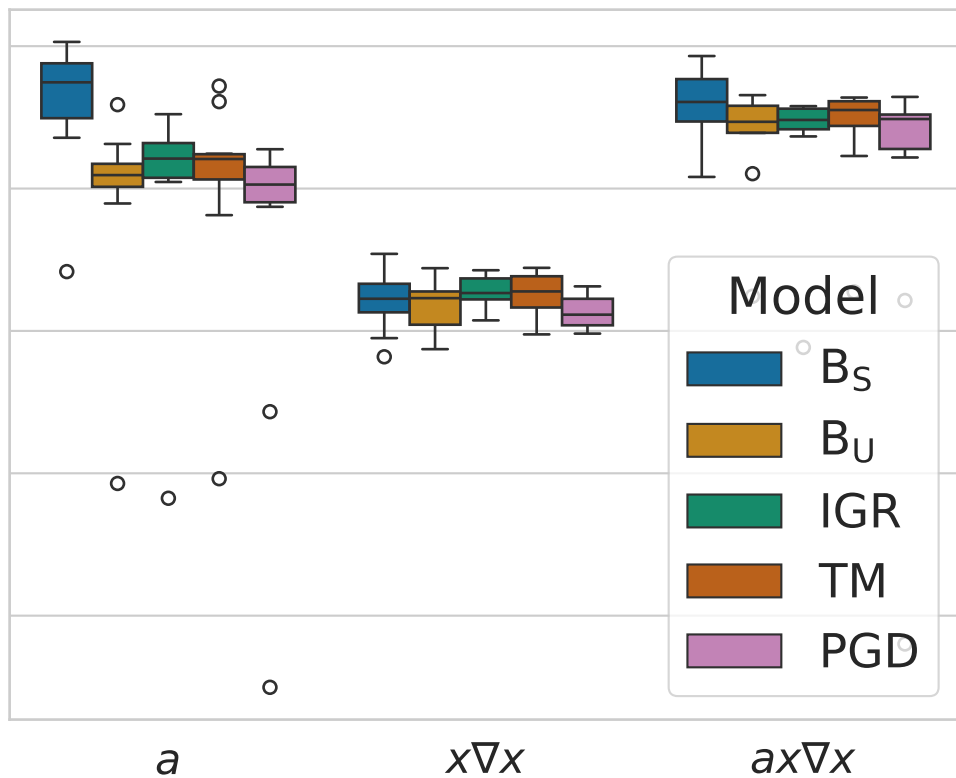

Supplement: software [file 2024.emnlp-main.280.software.zip]

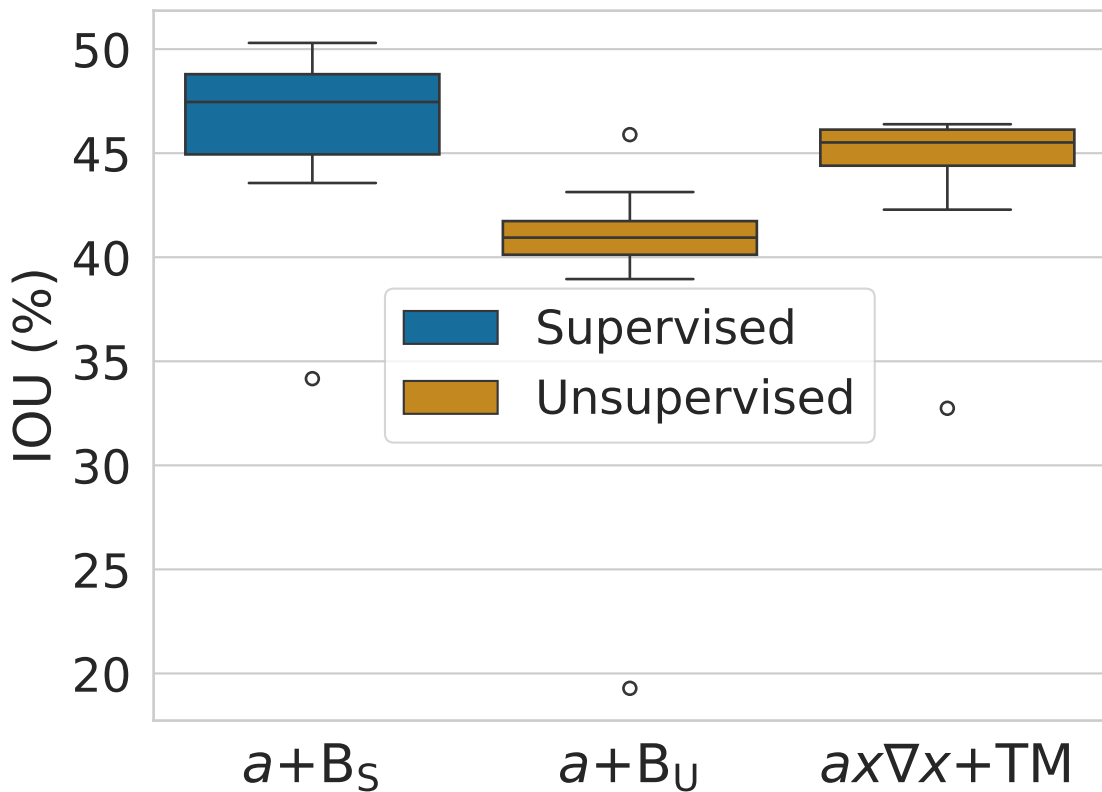

Supplement: software [file 2024.emnlp-main.280.software.zip]

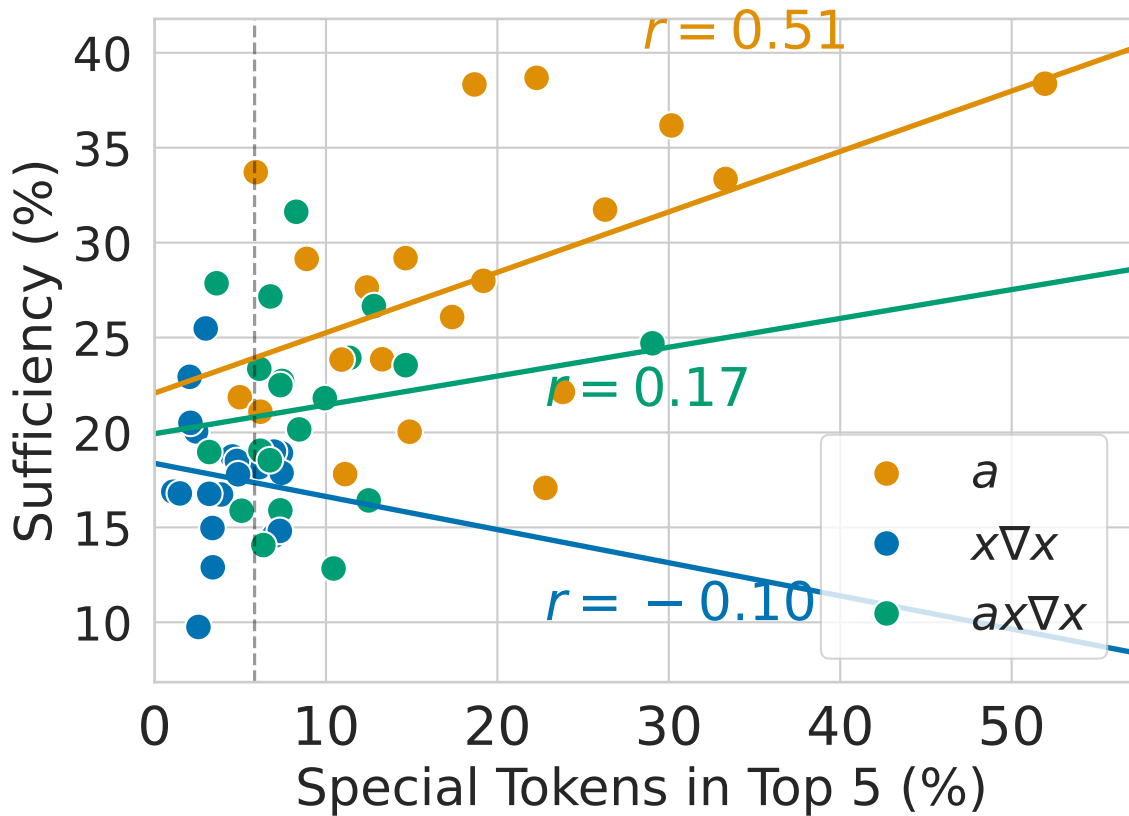

Supplement: software [file 2024.emnlp-main.280.software.zip]

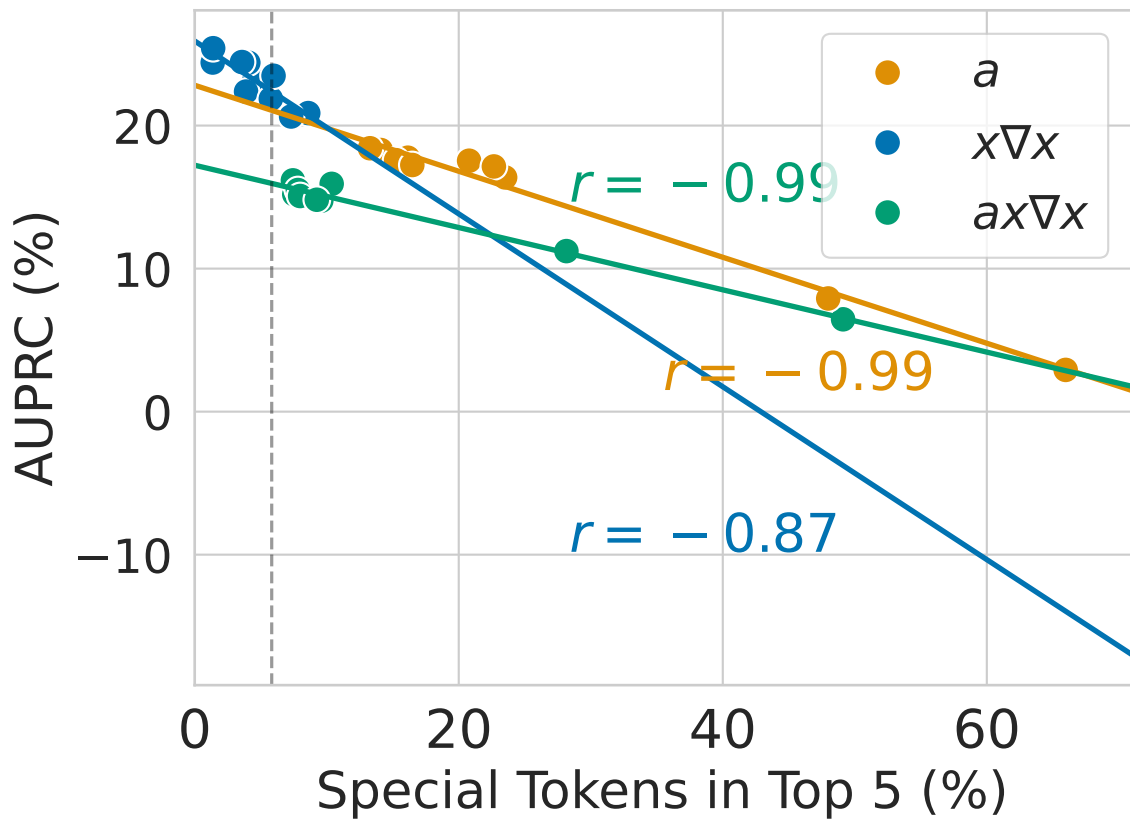

Supplement: software [file 2024.emnlp-main.280.software.zip]

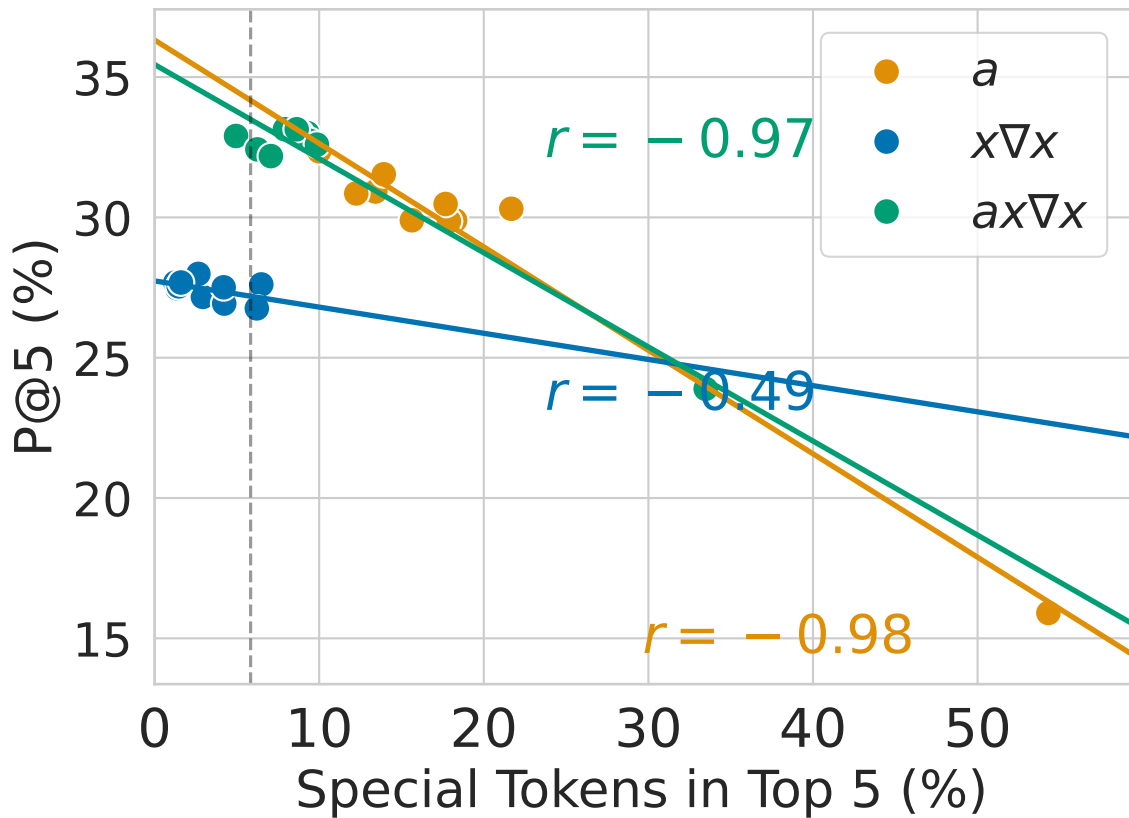

Supplement: software [file 2024.emnlp-main.280.software.zip]

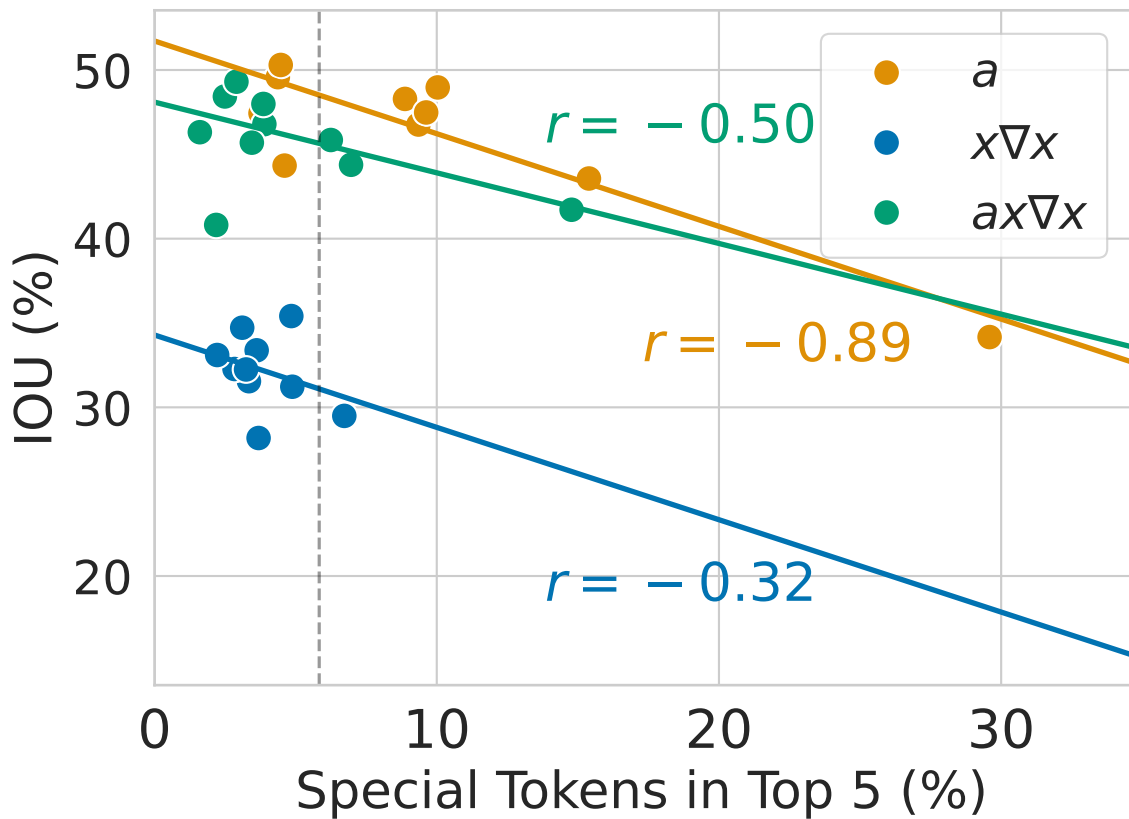

Supplement: software [file 2024.emnlp-main.280.software.zip]

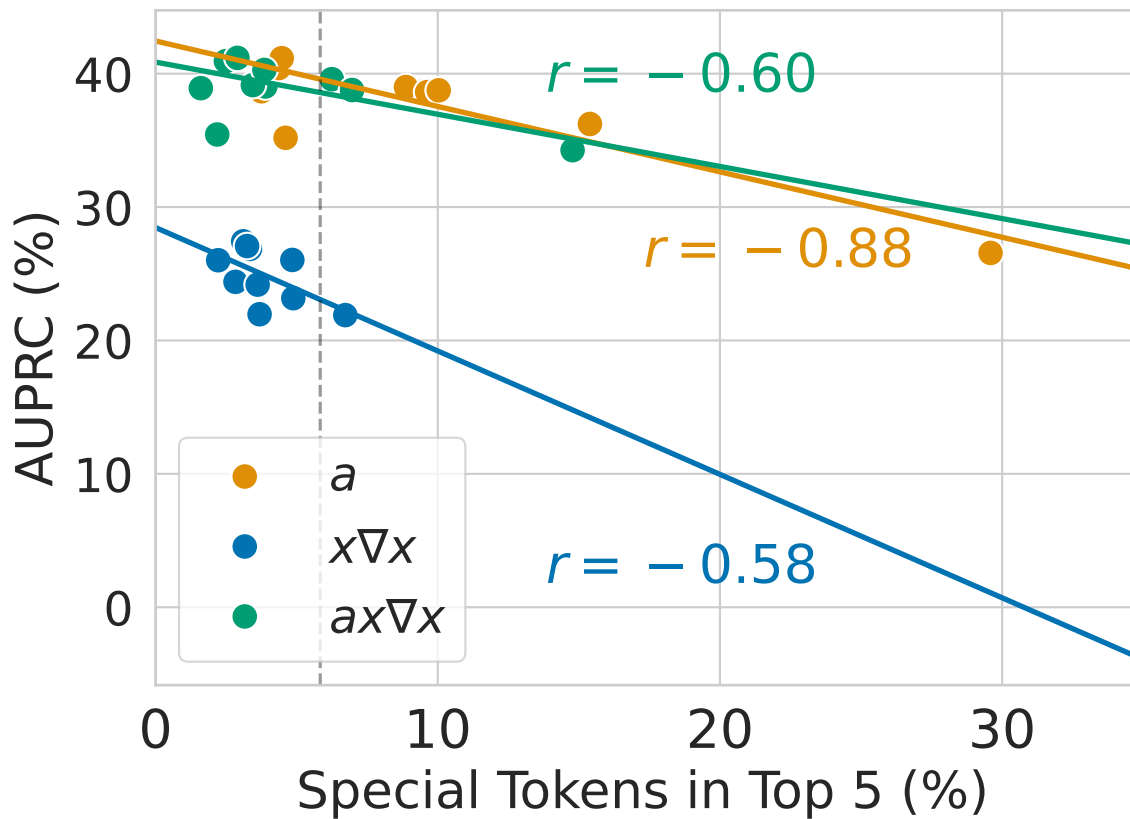

Supplement: software [file 2024.emnlp-main.280.software.zip]

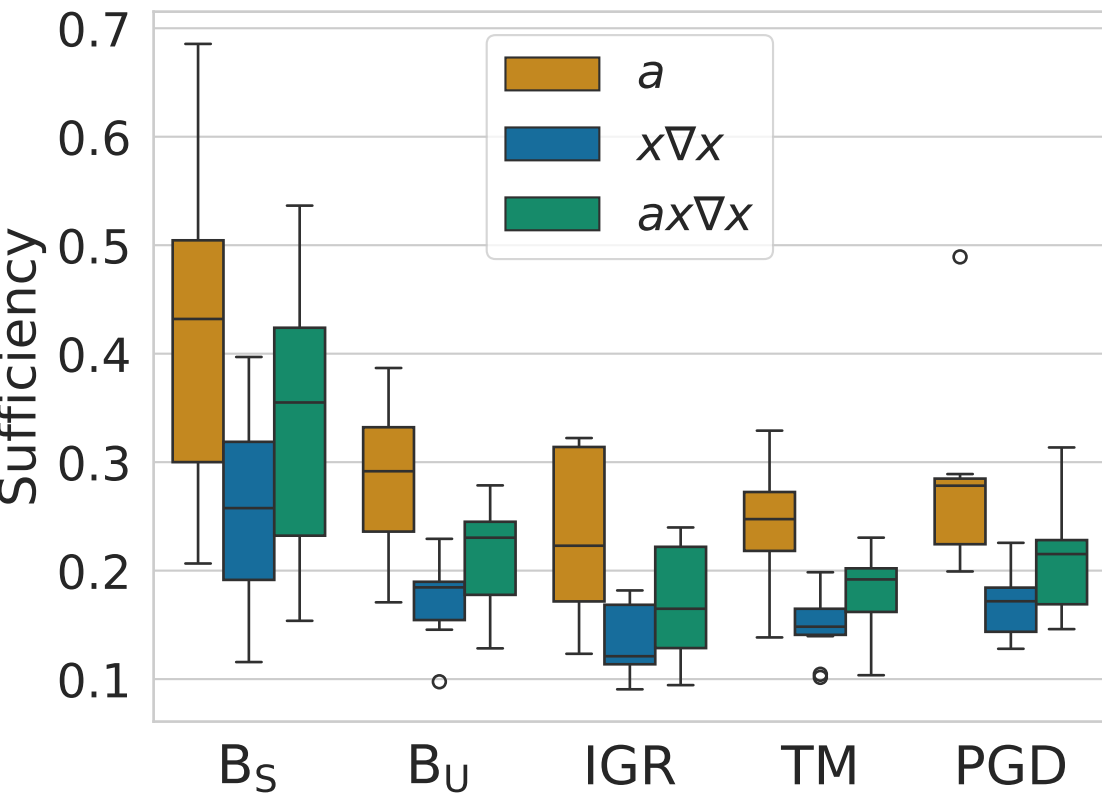

Supplement: software [file 2024.emnlp-main.280.software.zip]

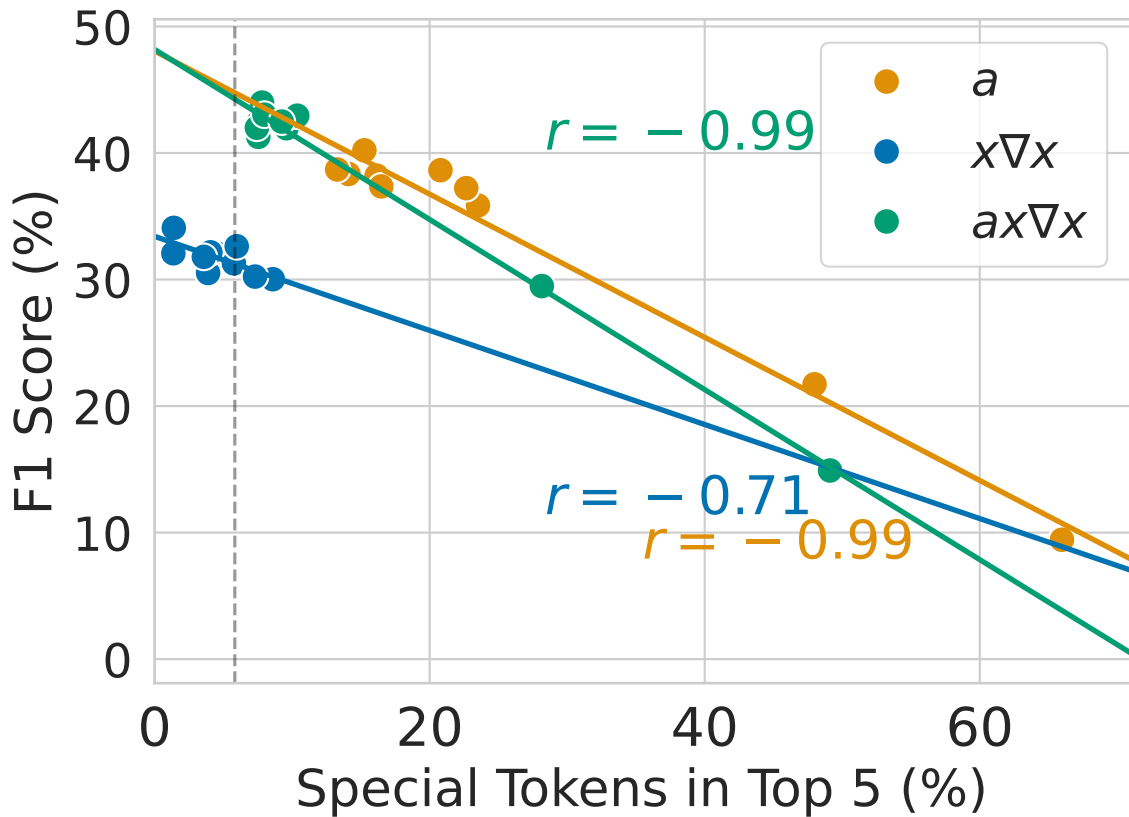

Supplement: software [file 2024.emnlp-main.280.software.zip]

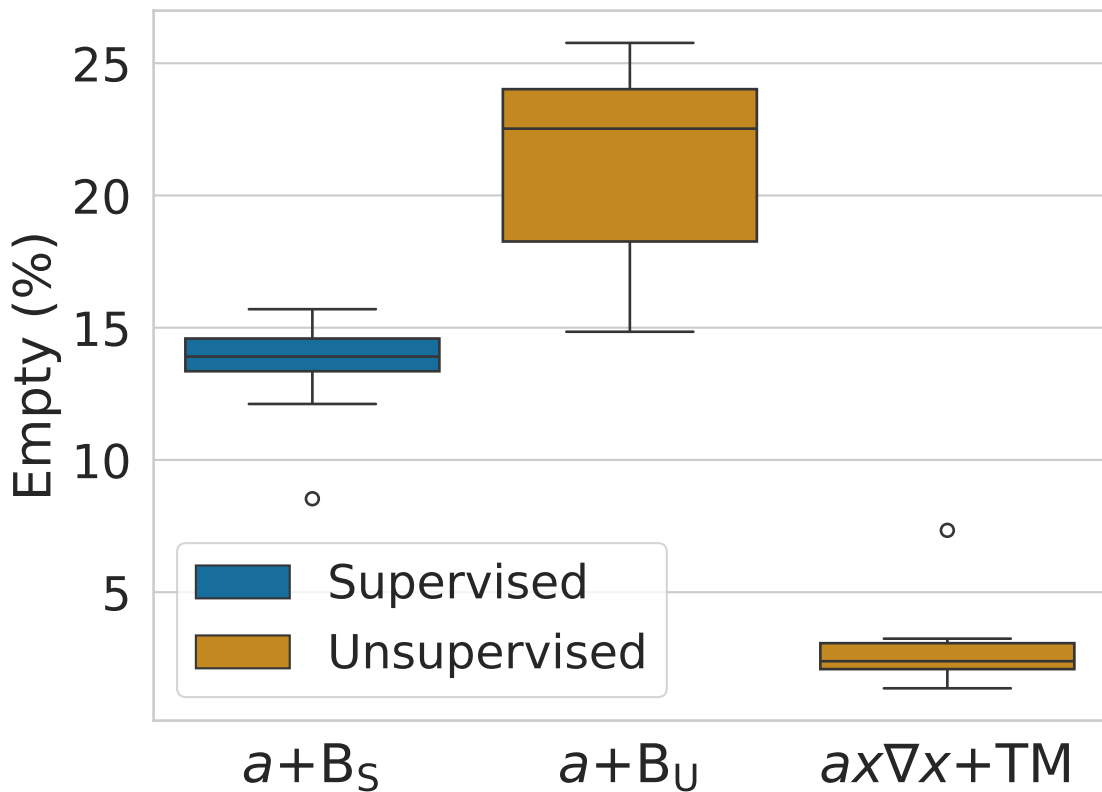

Supplement: software [file 2024.emnlp-main.280.software.zip]

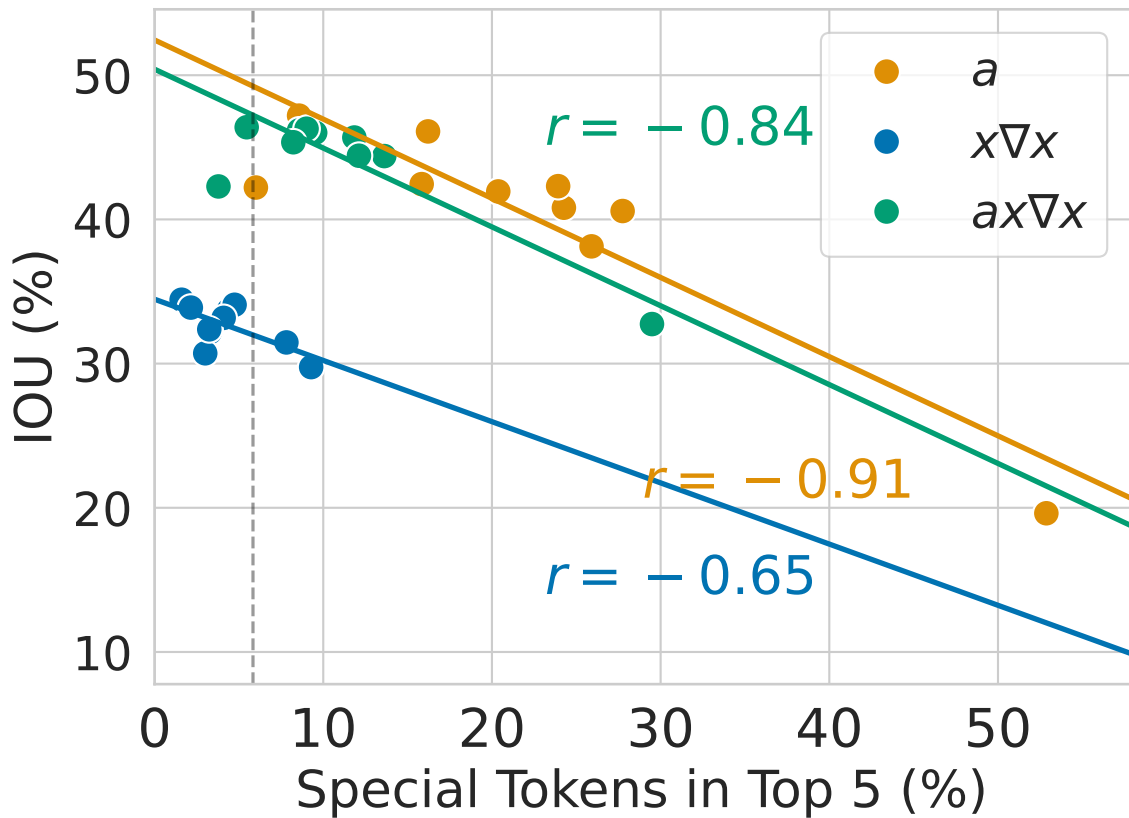

Supplement: software [file 2024.emnlp-main.280.software.zip]

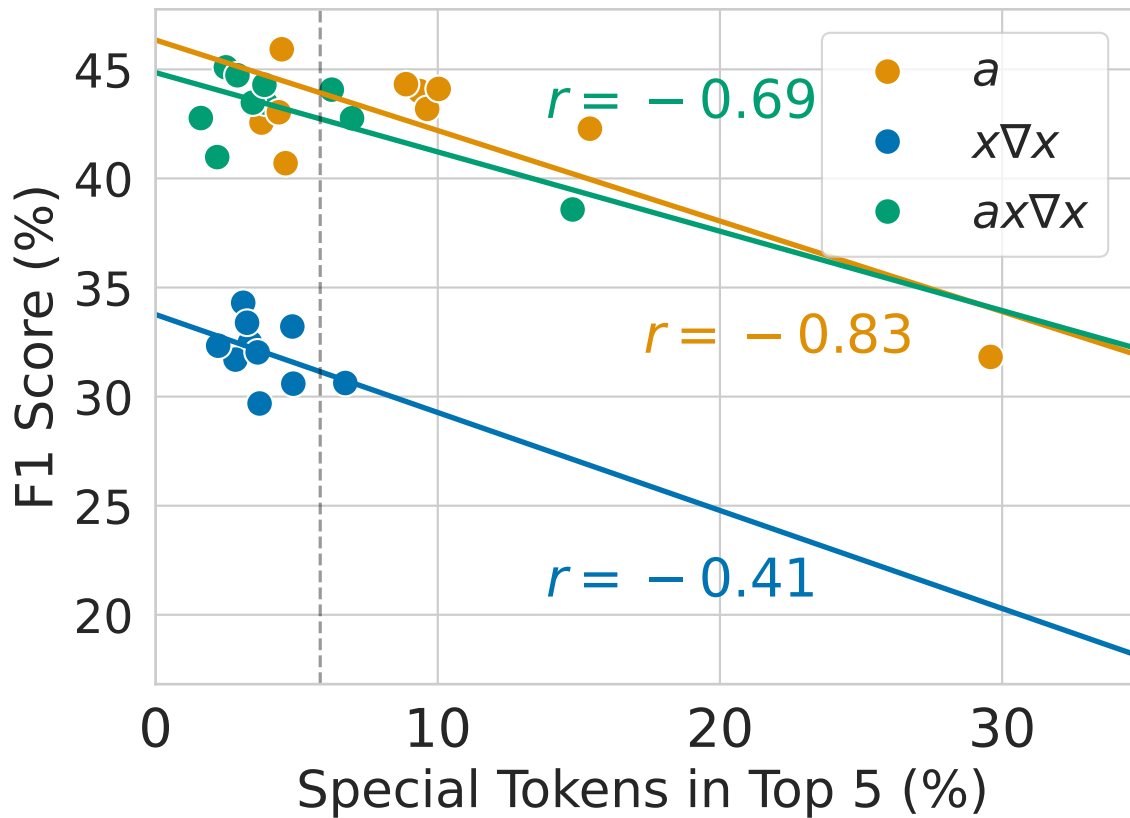

Supplement: software [file 2024.emnlp-main.280.software.zip]

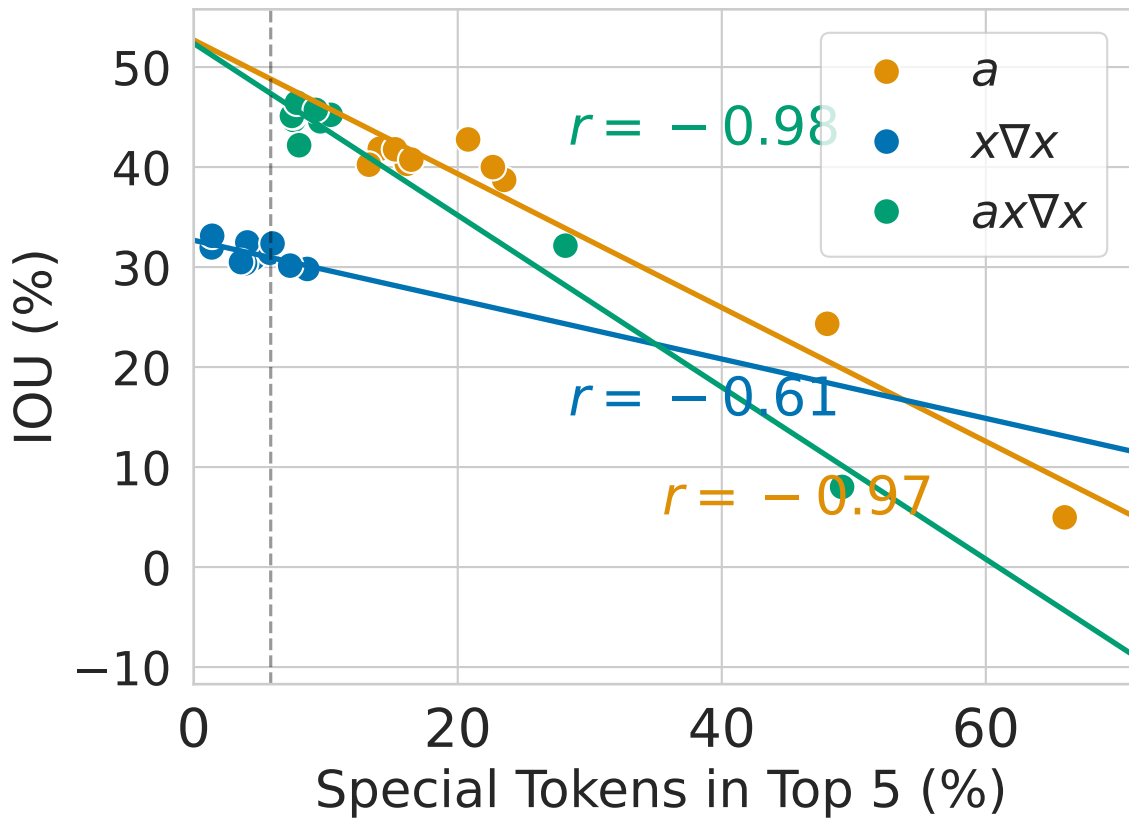

Supplement: software [file 2024.emnlp-main.280.software.zip]

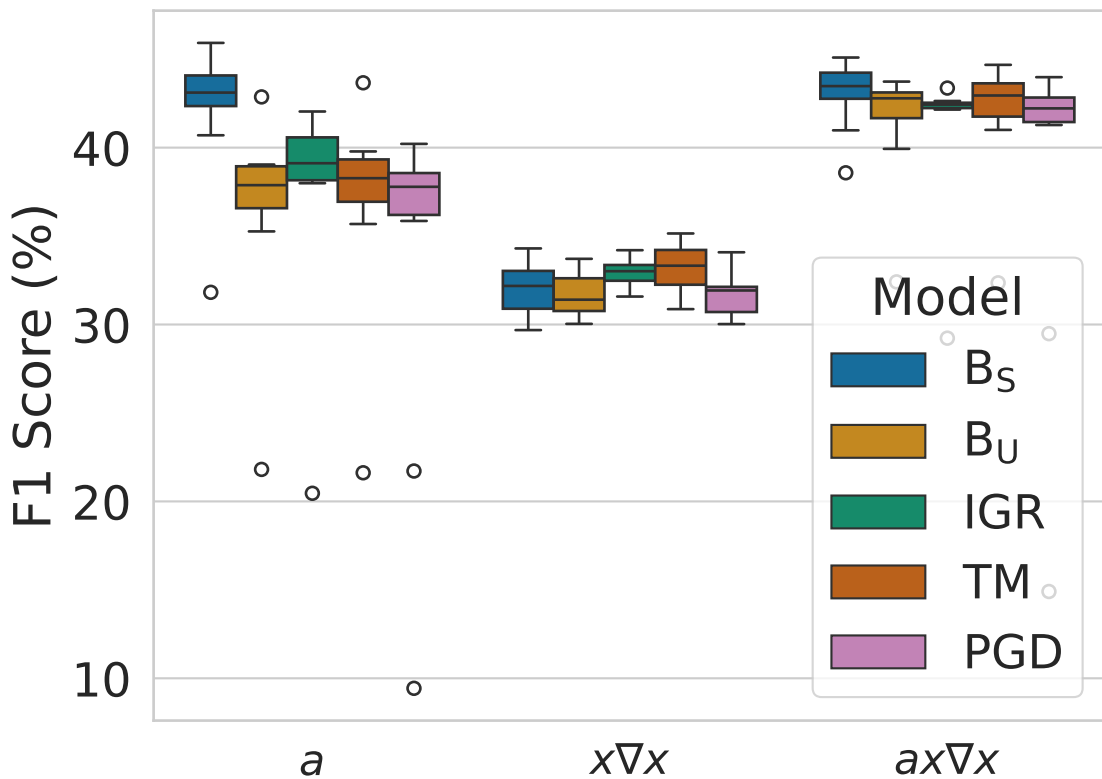

Supplement: software [file 2024.emnlp-main.280.software.zip]

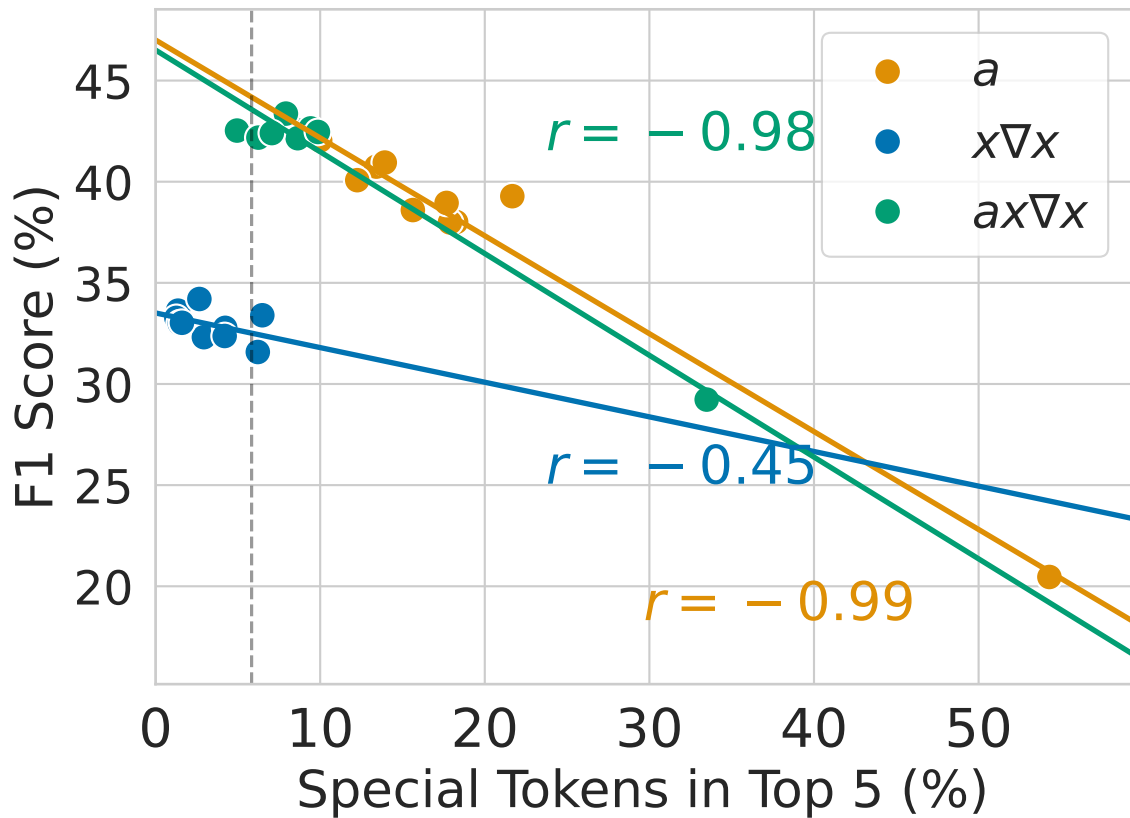

Supplement: software [file 2024.emnlp-main.280.software.zip]

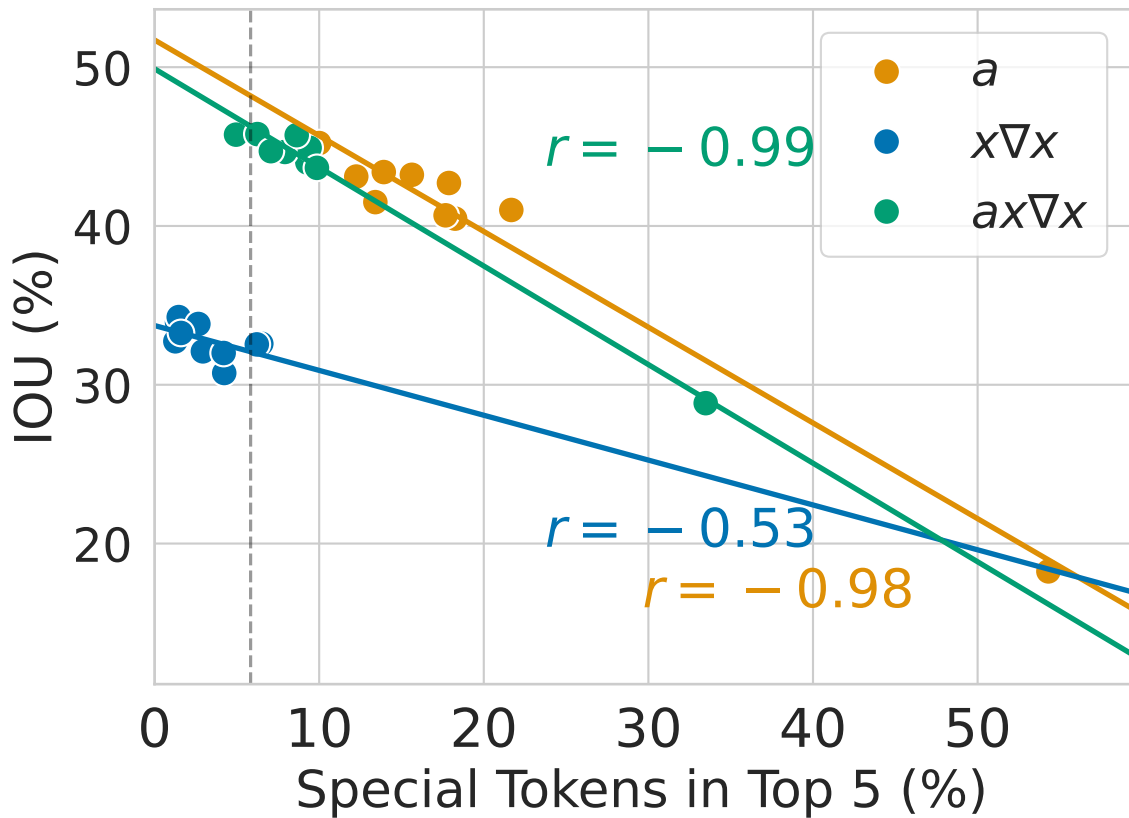

Supplement: software [file 2024.emnlp-main.280.software.zip]

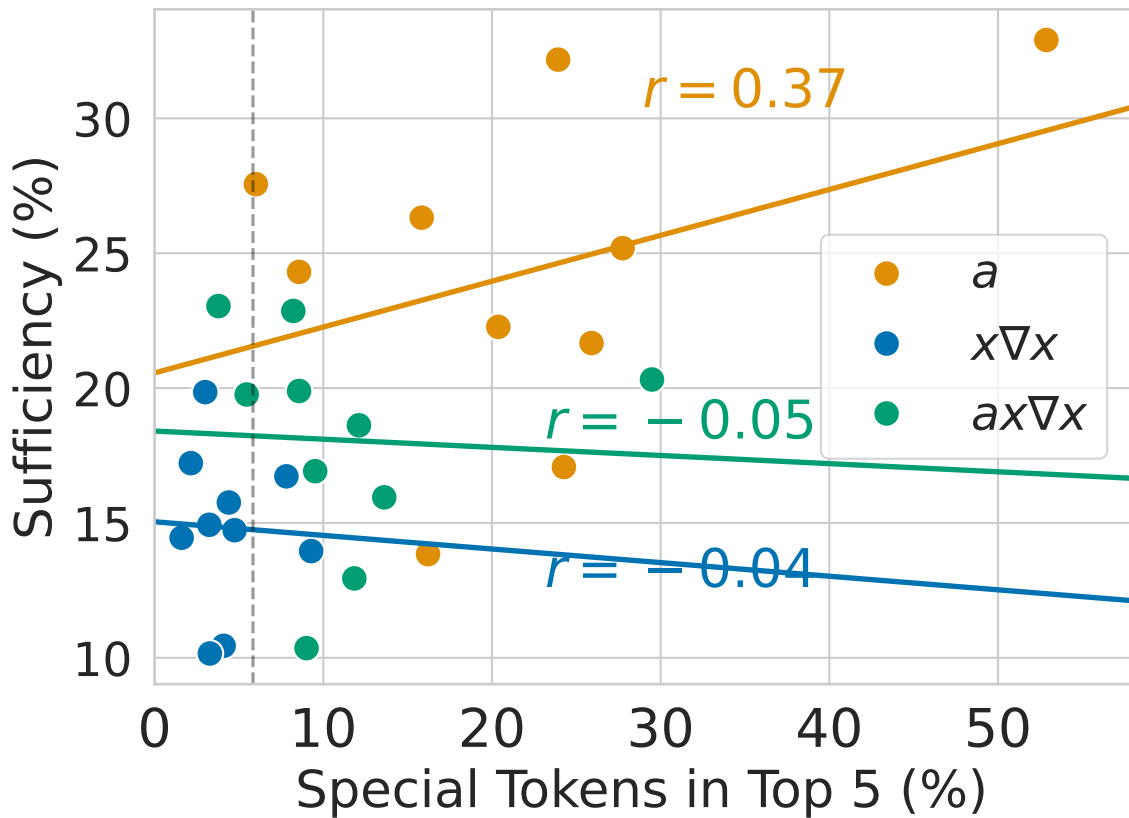

Supplement: software [file 2024.emnlp-main.280.software.zip]

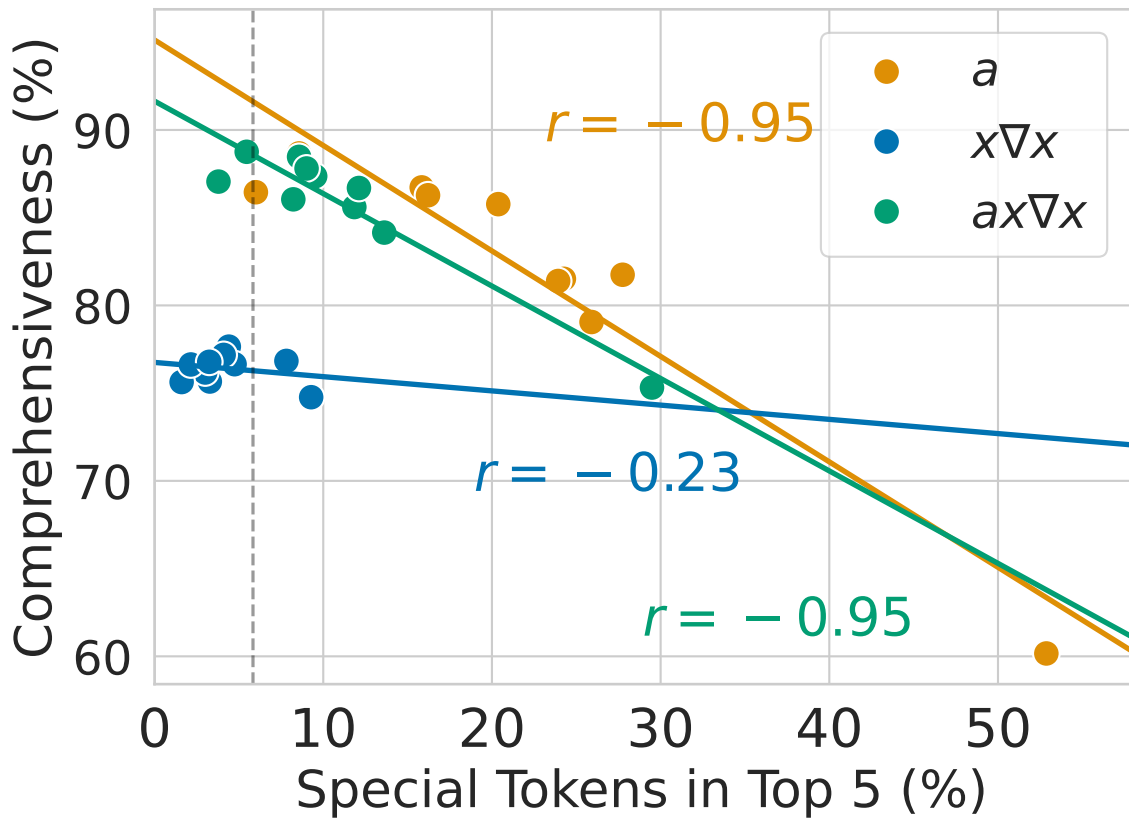

Supplement: software [file 2024.emnlp-main.280.software.zip]

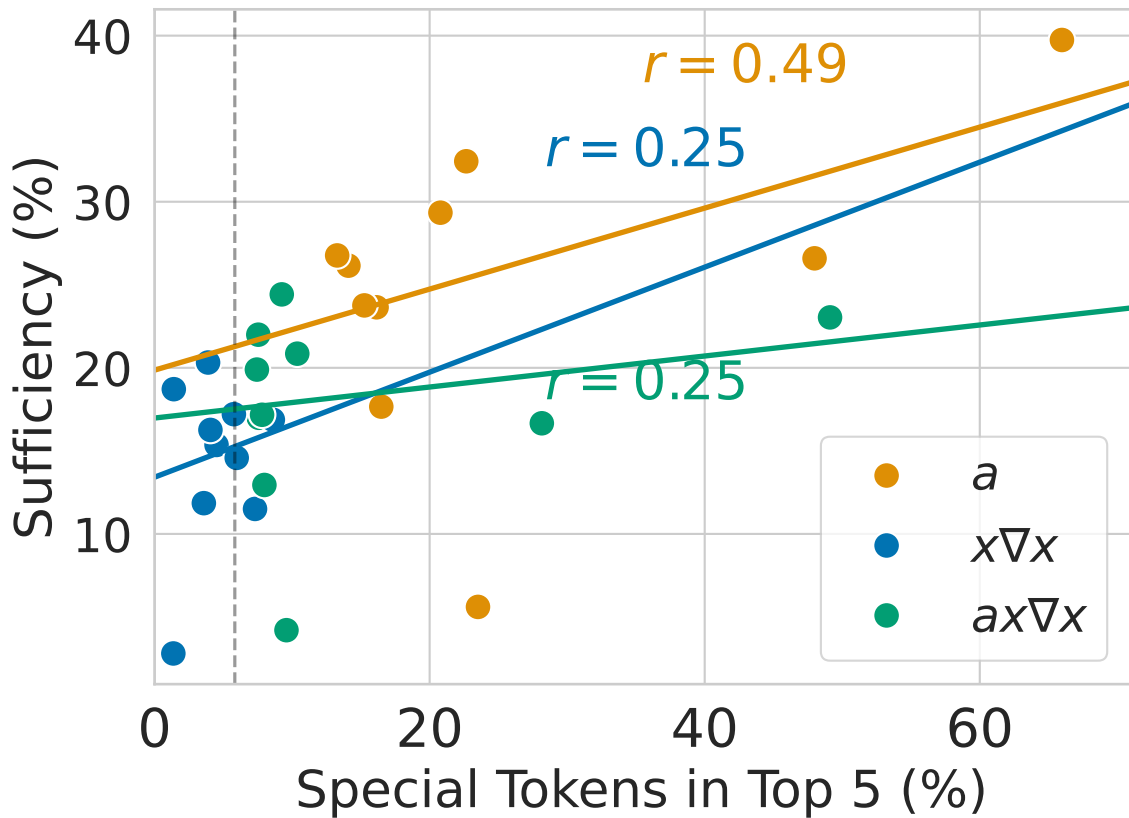

Supplement: software [file 2024.emnlp-main.280.software.zip]

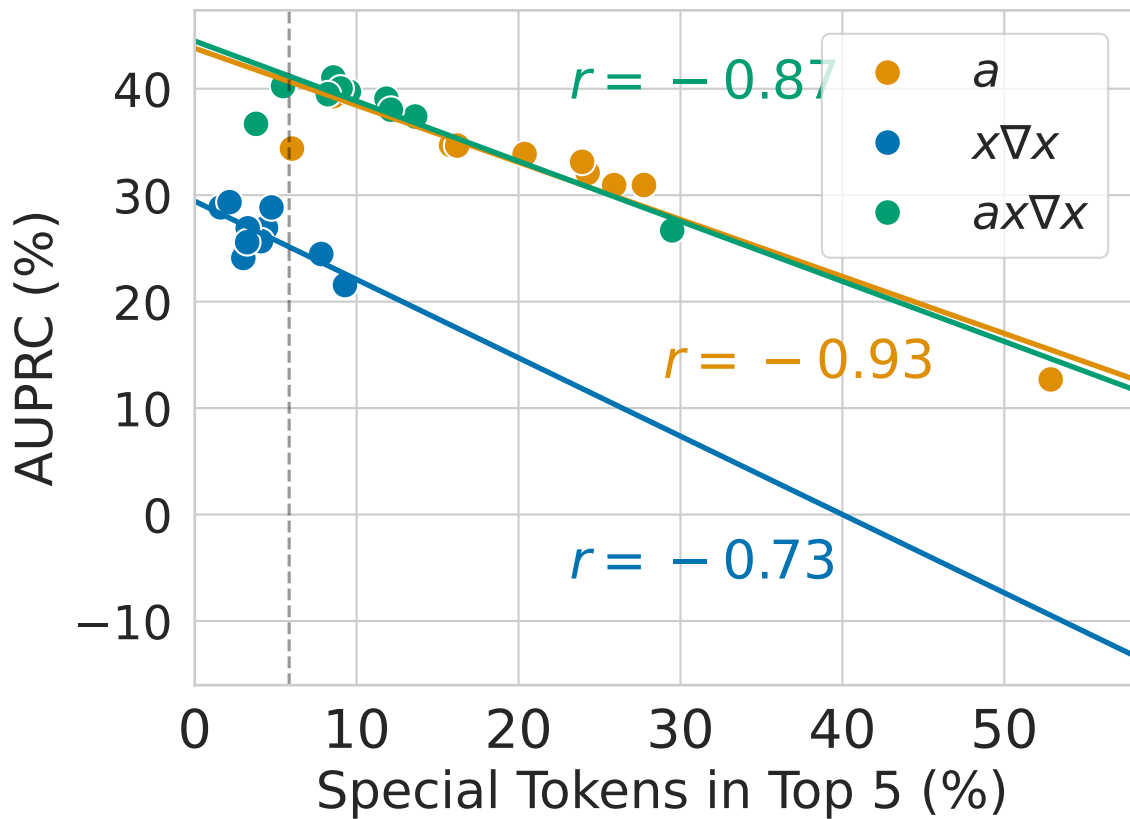

Supplement: software [file 2024.emnlp-main.280.software.zip]

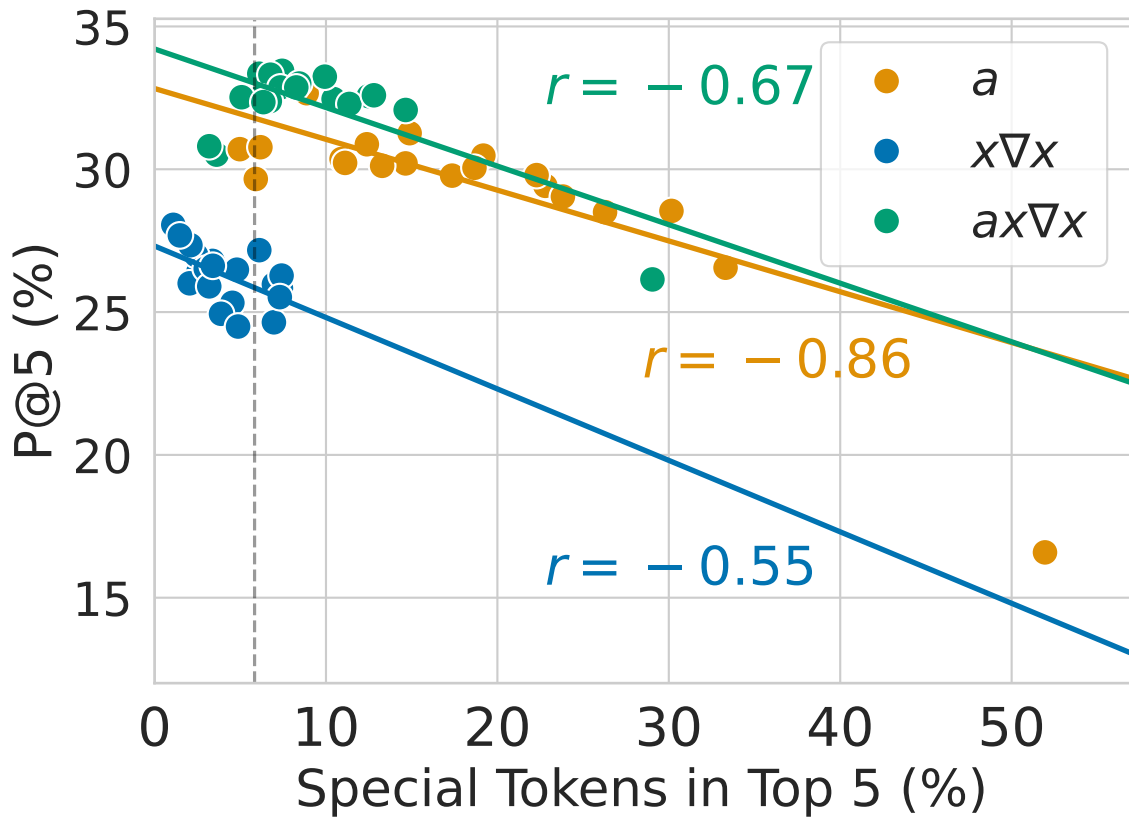

Supplement: software [file 2024.emnlp-main.280.software.zip]

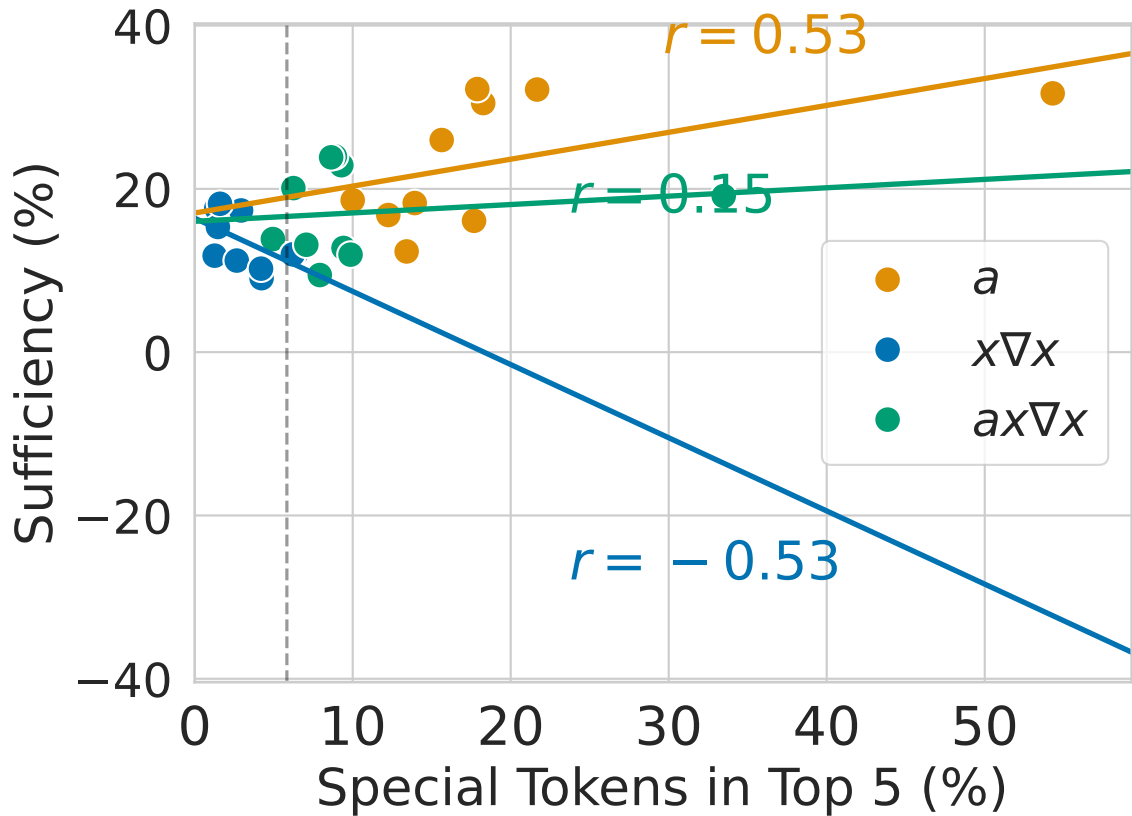

Supplement: software [file 2024.emnlp-main.280.software.zip]

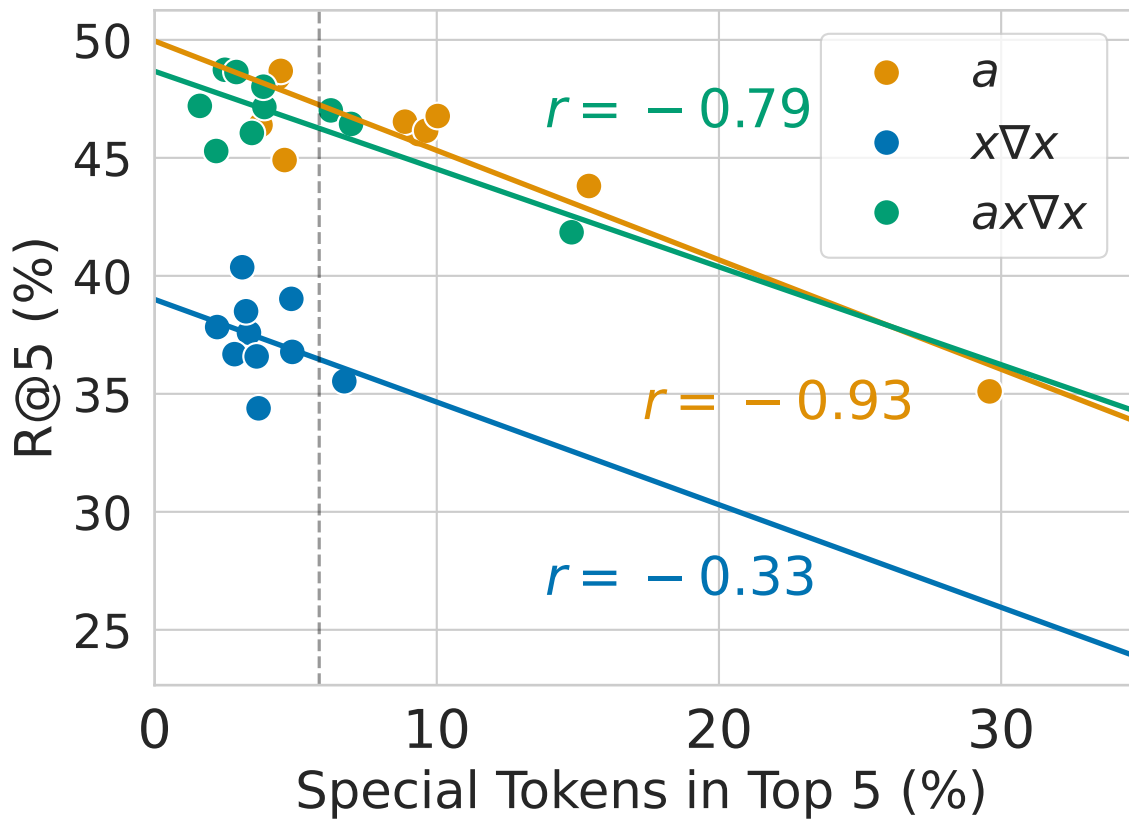

Supplement: software [file 2024.emnlp-main.280.software.zip]

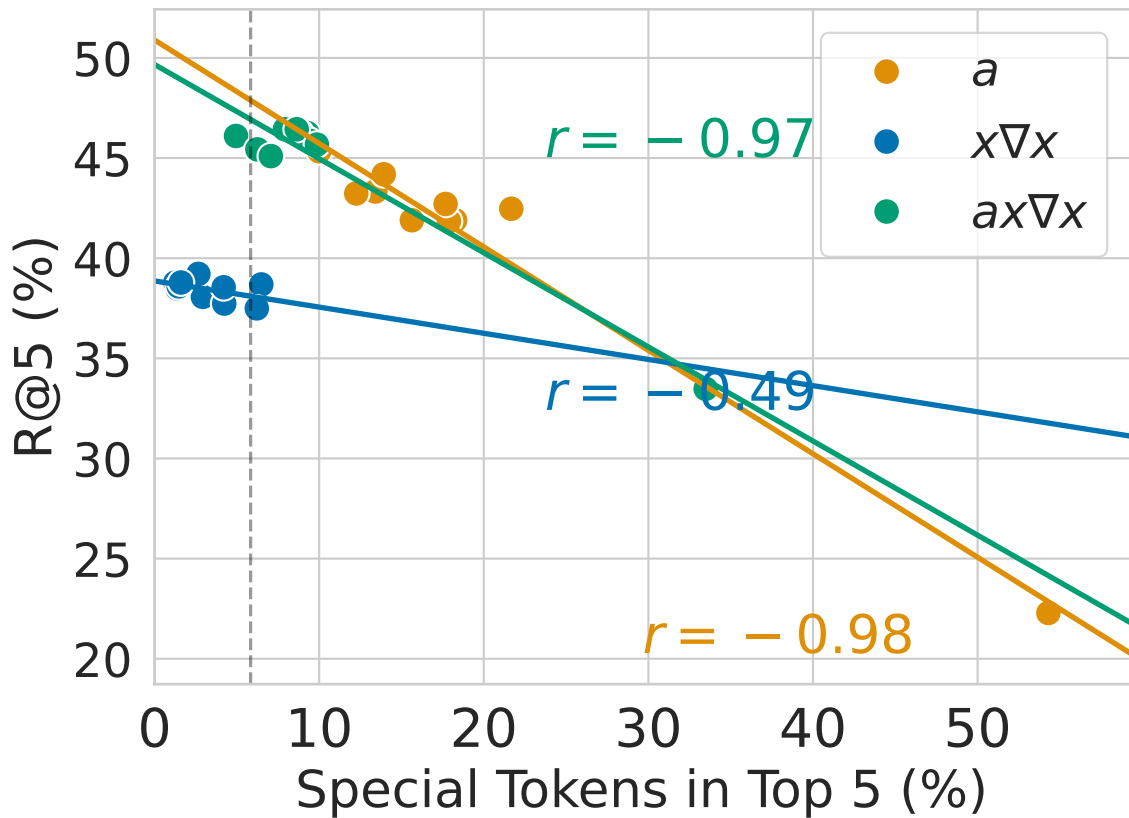

Supplement: software [file 2024.emnlp-main.280.software.zip]

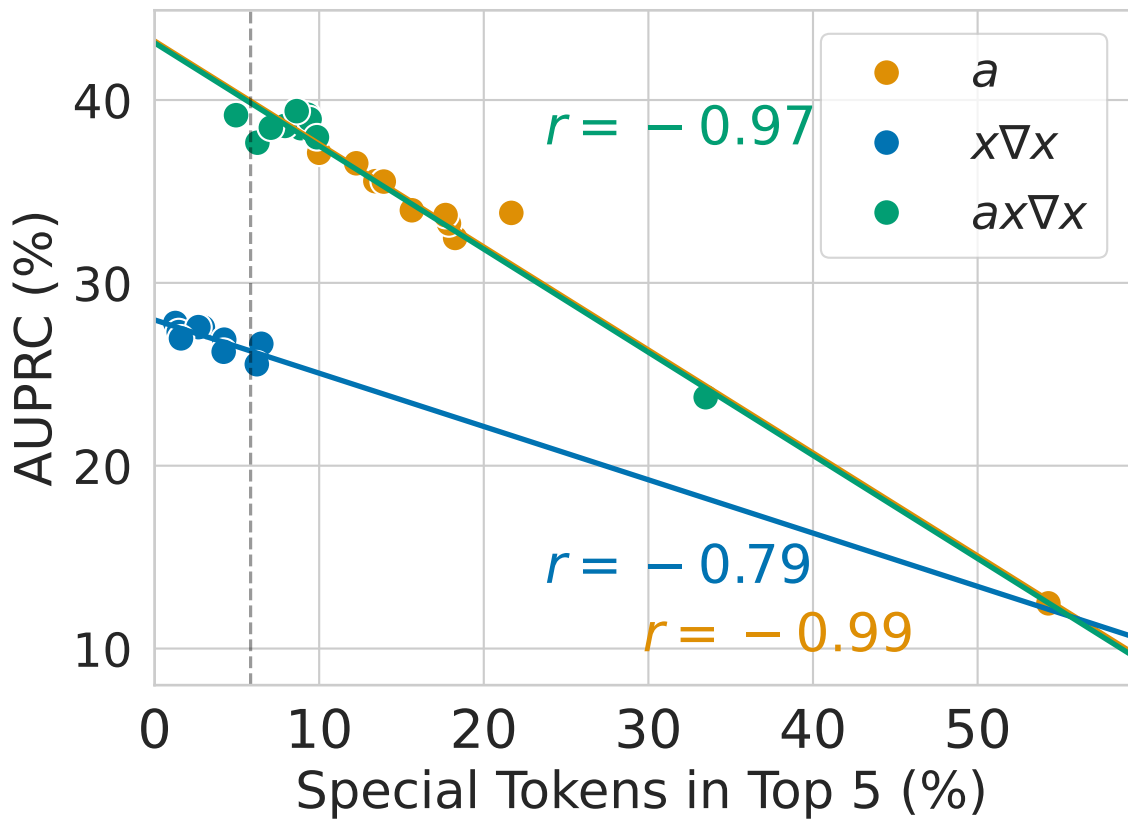

Supplement: software [file 2024.emnlp-main.280.software.zip]
